# Supplementary material for: Schiff-base [4]helicene Zn(ii) complexes as chiral emitters
Source: Royal Society of Chemistry journal article supplement (doi:10.1039/d1dt01752g), 2021-01-01
Supplement: d1dt01752g1.pdf [file d1dt01752g1.pdf]

**Supporting information for**

**Schiff-base [4]helicene Zn(II) complexes as chiral emitters**

Mariia Savchuk,<sup>†,a</sup> Steven Vertueux,<sup>†,a</sup> Thomas Cauchy,<sup>a</sup> Matthieu Loumaigne,<sup>a</sup> Francesco Zinna,<sup>b</sup> Lorenzo Di Bari,<sup>b</sup> Nicolas Zigon<sup>\*a</sup> and Narcis Avarvari <sup>\*a</sup>

<sup>a</sup> Univ Angers, CNRS, MOLTECH-Anjou, SFR MATRIX, F-49000 Angers, France. E-mail: nicolas.zigon@univ-angers.fr, narcis.avarvari@univ-angers.fr

<sup>b</sup> Dipartimento di Chimica e Chimica Industriale, Università di Pisa, via G. Moruzzi, 13, 56124, Pisa, Italy.

† These authors contributed equally to this work.

## SUMMARY

**Figure S1.** Normalized emission and excitation spectra ( $\lambda_{em} = 350$  nm ;  $\lambda_{exc} = 530$  nm) of the complexes a) **1**, b) **2**, c) **3** and d) **4** (THF,  $10^{-5}$ M range, blue: absorption ; red: excitation ; black : emission).

**Table S1:** Quantum yields and fluorescence lifetime for compounds **1-4**.

**Table S2:** Crystallographic data, details of data collection and structure refinement parameters for compounds **1, 4, 8** and **9**.

**Figure S2.** Packing diagram along *a* for compound **8** (hydrogen atoms omitted for the sake of clarity).

**Figure S3.** Packing diagram along *b* for compound **9** (hydrogen atoms omitted for the sake of clarity).

**Table S3.** Selected bond distances (Å) and dihedral angle between two aromatic helicene planes for compounds **8** and **9**.

**Figure S4.** X-ray structure of complex **1** (Carbon: black ; Nitrogen : blue ; Oxygen : red ; Zinc : grey ; Hydrogen : white) and packing diagram along *b* for compound **1** (hydrogen atoms omitted for the sake of clarity).

**Figure S5.** Packing diagram along *a* for compound **4** (hydrogen atoms and solvent molecule omitted for the sake of clarity).

**Figure S6.** Packing diagram along *c* for compound **4** (hydrogen atoms and solvent molecule omitted for the sake of clarity).

**Table S4.** Selected bond angles (°) and helicene twist for compounds **1** and **4**.

**Figure S7.** Chemical structure diagram of **1A (R,R/P,P)** with atomic numbering from two points of view.

**Table S5.** Calculation report for **1A (R,R/P,P)**.

**Table S6.** Most intense (> 20 km/mol) molecular vibrations in wavenumbers for **1A (R,R/P,P)**.

**Table S7.** Results concerning the calculated mono-electronic excitations **1A (R,R/P,P)**.

**Figure S8.** HOMO-1, HOMO, LUMO, and LUMO+1 (from bottom to top, two views each) for **1A (R,R/P,P)**.

**Figure S9.** Representation of the Electron Density Difference (S1-S0 left) and (S2-S0 right) for **1A (R,R/P,P)**.

**Figure S10.** Calculated UV absorption spectrum for **1A (R,R/P,P)** with a gaussian broadening (FWHM = 3000  $\text{cm}^{-1}$ ).

**Figure S11.** Calculated Circular Dichroism spectrum for **1A (R,R/P,P)** with a gaussian broadening (FWHM = 3000  $\text{cm}^{-1}$ ).

**Figure S12.** Chemical structure diagram of **1B (R,R/M,M)** with atomic numbering from two points of view.

**Table S8.** Calculation report for **1B (R,R/M,M)**.

**Table S9.** Most intense (> 20 km/mol) molecular vibrations in wavenumbers for **1B (R,R/M,M)**.

**Table S10.** Results concerning the calculated mono-electronic excitations for **1B (R,R/M,M)**.

**Figure S13.** HOMO-1, HOMO, LUMO, and LUMO+1 (from bottom to top, two views each) for **1B (R,R/M,M)**.

**Figure S14.** Representation of the Electron Density Difference (S1-S0 left) and (S2-S0 right) for **1B (R,R/M,M)**. The excited electron and the hole regions are indicated by blue and white surfaces, respectively.

**Figure S15.** Calculated UV absorption spectrum for **1B (R,R/M,M)** with a gaussian broadening (FWHM = 3000  $\text{cm}^{-1}$ ).

**Figure S16.** Calculated Circular Dichroism spectrum for **1B (R,R/M,M)** with a gaussian broadening (FWHM = 3000  $\text{cm}^{-1}$ ).

**$^1\text{H}$ ,  $^{13}\text{C}$  NMR and 2D spectrum** for compounds **1, 2, 3, 4, 6, 7, 8** and **9**.

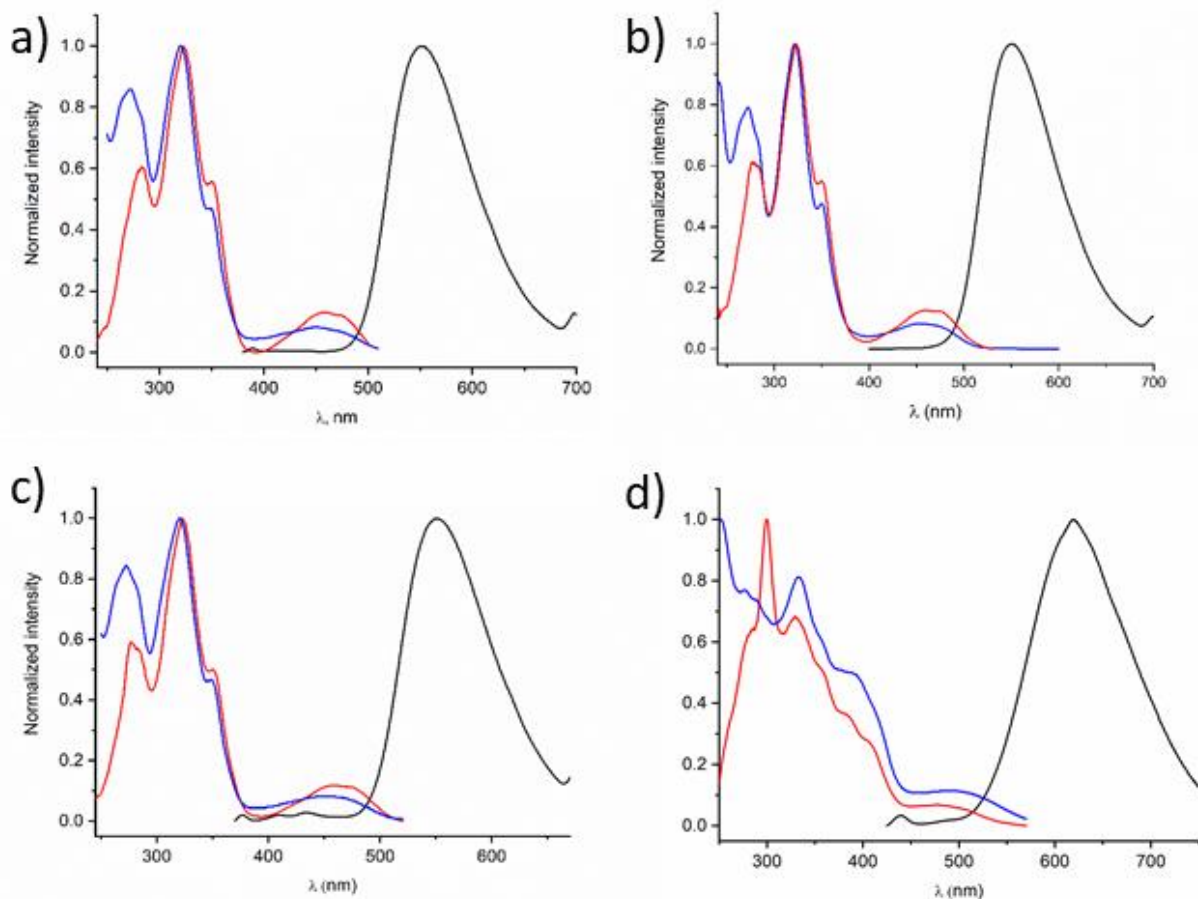

**Figure S1.** Normalized emission and excitation spectra ( $\lambda_{em} = 350$  nm ;  $\lambda_{exc} = 530$  nm) of the complexes a) **1**, b) **2**, c) **3** and d) **4** (THF,  $10^{-5}$ M range, blue: absorption ; red: excitation ; black : emission).

|                                     | <b>1</b>  | <b>2</b>  | <b>3</b>  | <b>4</b>    |
|-------------------------------------|-----------|-----------|-----------|-------------|
| <b>%QY</b>                          | 12        | 10        | 16        | 2.5         |
| <b><math>\tau_{1/2}</math> (ns)</b> | 1.2 ; 5.4 | 1.6 ; 6.1 | 1.3 ; 5.4 | 1.09 ; 3.15 |

**Table S1:** Quantum yields (QS 0.1N H<sub>2</sub>SO<sub>4</sub>) and fluorescence lifetime for compounds **1-4**.

X-Ray structure determinations Details about data collection and solution refinement are given in Table S2. Data collections were performed on a Rigaku Oxford Diffraction SuperNova diffractometer equipped with an Atlas CCD detector and micro-focus Cu-K $\alpha$  radiation ( $\lambda = 1.54184$  Å). The structures were solved by intrinsic phasing and refined on F<sup>2</sup> by full matrix least-squares techniques with SHELX programs (SHELXT 2018/2 and SHELXL 2018/3)<sup>1,2</sup> using the ShelXle and the Olex2 graphical user interfaces.<sup>3,4</sup> All non-H atoms were refined anisotropically and absorption was corrected by Gaussian

technique for **4** or multiscan empirical absorption using spherical harmonics with CrysAlisPro program for **1**, **8** and **9**. The H atoms were placed at calculated positions and refined using a riding model. Compound **1**, despite numerous crystallization trials and several X-Ray experiments with extended exposure time, could only be obtained as small needles with a weak diffracting power. The best data set was used and a cut-off at 1 Å was applied. Crystallographic data for the four structures have been deposited with the Cambridge Crystallographic Data Centre, deposition numbers CCDC 2080969 for **1**, 2080966 for **4**, 2080967 for **8**, 2080968 for **9**. These data can be obtained free of charge from CCDC, 12 Union road, Cambridge CB2 1EZ, UK (e-mail: [deposit@ccdc.cam.ac.uk](mailto:deposit@ccdc.cam.ac.uk) or <http://www.ccdc.cam.ac.uk>).

|                                                                                                                      | <b>1</b>                                                                      | <b>4</b>                                                         | <b>8</b>                                        | <b>9</b>                                       |
|----------------------------------------------------------------------------------------------------------------------|-------------------------------------------------------------------------------|------------------------------------------------------------------|-------------------------------------------------|------------------------------------------------|
| Formula sum                                                                                                          | C <sub>88</sub> H <sub>68</sub> N <sub>4</sub> O <sub>6</sub> Zn <sub>2</sub> | C <sub>48</sub> H <sub>36</sub> N <sub>2</sub> O <sub>4</sub> Zn | C <sub>20</sub> H <sub>15</sub> NO <sub>2</sub> | C <sub>19</sub> H <sub>12</sub> O <sub>2</sub> |
| Formula weight                                                                                                       | 1408.20                                                                       | 770.16                                                           | 301.33                                          | 272.29                                         |
| Crystal system                                                                                                       | monoclinic                                                                    | monoclinic                                                       | monoclinic                                      | monoclinic                                     |
| Space group                                                                                                          | <i>P</i> 2                                                                    | <i>P</i> 2 <sub>1</sub> / <i>c</i>                               | <i>P</i> 2 <sub>1</sub> / <i>n</i>              | <i>P</i> 2 <sub>1</sub> / <i>n</i>             |
| <i>a</i> /Å                                                                                                          | 19.960(3)                                                                     | 8.1499(14)                                                       | 10.7403(2)                                      | 16.1657(14)                                    |
| <i>b</i> /Å                                                                                                          | 8.349(2)                                                                      | 30.4057(15)                                                      | 10.84250(16)                                    | 4.0638(4)                                      |
| <i>c</i> /Å                                                                                                          | 20.342(4)                                                                     | 17.238(3)                                                        | 13.7128(3)                                      | 20.4368(16)                                    |
| $\alpha$ /°                                                                                                          | 90                                                                            | 90                                                               | 90                                              | 90                                             |
| $\beta$ /°                                                                                                           | 90.642(13)                                                                    | 121.19(2)                                                        | 109.066(2)                                      | 109.294(9)                                     |
| $\gamma$ /°                                                                                                          | 90                                                                            | 90                                                               | 90                                              | 90                                             |
| <i>V</i> /Å <sup>3</sup>                                                                                             | 3389.7(13)                                                                    | 3654.2(13)                                                       | 1509.27(5)                                      | 1267.2(2)                                      |
| <i>Z</i>                                                                                                             | 2                                                                             | 4                                                                | 4                                               | 4                                              |
| <i>D<sub>c</sub></i> /g cm <sup>-3</sup>                                                                             | 1.380                                                                         | 1.400                                                            | 1.326                                           | 1.427                                          |
| <i>T</i> /K                                                                                                          | 150.00(10)                                                                    | 293(2)                                                           | 150.00(10)                                      | 150.00(10)                                     |
| $\mu$ /mm <sup>-1</sup>                                                                                              | 1.360                                                                         | 1.334                                                            | 0.686                                           | 0.734                                          |
| Reflections collected                                                                                                | 13252                                                                         | 13412                                                            | 10197                                           | 5945                                           |
| Independent reflection                                                                                               | 7046[R <sub>int</sub> = 0.1775]                                               | 6896[R <sub>int</sub> = 0.1067]                                  | 3167[R <sub>int</sub> = 0.0201]                 | 2583[R <sub>int</sub> = 0.0257]                |
| final <i>R</i> <sub>1</sub> <sup>a</sup> , <i>wR</i> <sub>2</sub> <sup>b</sup> [ <i>I</i> > 2 $\sigma$ ( <i>I</i> )] | 0.0853/ 0.1557                                                                | 0.0933/ 0.2204                                                   | 0.0370/0.0986                                   | 0.0454/0.1218                                  |
| <i>R</i> <sub>1</sub> <sup>a</sup> , <i>wR</i> <sub>2</sub> <sup>b</sup> (all data)                                  | 0.2592/ 0.2361                                                                | 0.1700/0.2875                                                    | 0.0397/0.1021                                   | 0.510/0.1290                                   |
| goodness-of-fit on <i>F</i> <sup>2</sup>                                                                             | 0.940                                                                         | 1.026                                                            | 1.055                                           | 1.036                                          |
| $\Delta\rho_{\min}/\Delta\rho_{\max}$ (e Å <sup>-3</sup> )                                                           | -0.23/0.37                                                                    | -0.89/0.86                                                       | -0.21/0.18                                      | -0.25/0.18                                     |
| Completeness (%)                                                                                                     | 99.2 (1 Å resolution)                                                         | 98.8                                                             | 100.0                                           | 99.7                                           |
| CCDC number                                                                                                          | 2080969                                                                       | 2080966                                                          | 2080967                                         | 2080968                                        |

<sup>a</sup> $R_1 = \sum ||F_o| - |F_c|| / \sum |F_o|$ . <sup>b</sup> $wR_2 = [\sum w(F_o^2 - F_c^2)^2 / \sum w(F_o^2)^2]^{1/2}$ ;  $w = 1/[\sigma^2(F_o^2) + (aP)^2 + bP]$  where  $P = [\max(F_o^2, 0) + 2F_c^2]/3$ .

**Table S2** : Crystallographic data, details of data collection and structure refinement parameters for compounds **1, 4, 8 and 9**.

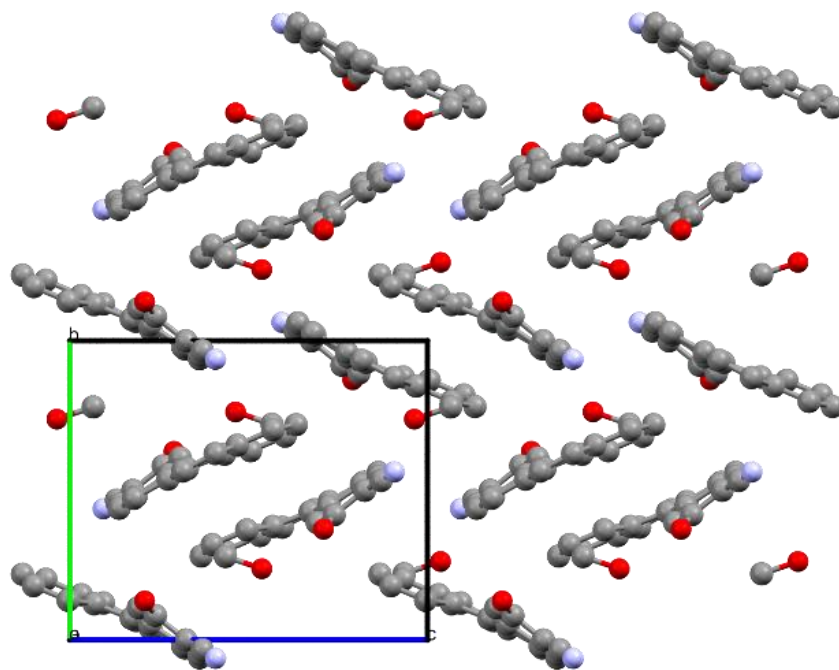

**Figure S2.** Packing diagram along  $a$  for compound **8** (hydrogen atoms omitted for the sake of clarity).

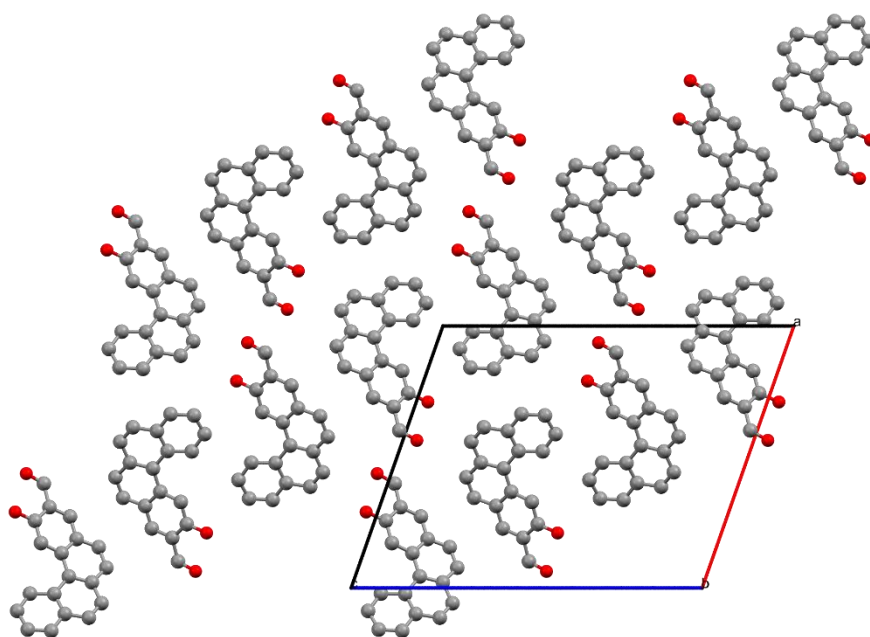

**Figure S3.** Packing diagram along  $b$  for compound **9** (hydrogen atoms omitted for the sake of clarity).

| 8                                                                                      |     |          | 9                                                                                      |     |          |
|----------------------------------------------------------------------------------------|-----|----------|----------------------------------------------------------------------------------------|-----|----------|
| C1                                                                                     | C2  | 1.376(2) | C1                                                                                     | C2  | 1.379(3) |
| C2                                                                                     | C3  | 1.403(2) | C2                                                                                     | C3  | 1.399(2) |
| C3                                                                                     | C4  | 1.365(2) | C3                                                                                     | C4  | 1.370(3) |
| C4                                                                                     | C5  | 1.411(2) | C4                                                                                     | C5  | 1.409(2) |
| C5                                                                                     | C6  | 1.431(2) | C5                                                                                     | C6  | 1.429(2) |
| C6                                                                                     | C1  | 1.419(1) | C5                                                                                     | C7  | 1.426(2) |
| C5                                                                                     | C7  | 1.426(1) | C7                                                                                     | C8  | 1.349(2) |
| C7                                                                                     | C8  | 1.347(2) | C8                                                                                     | C9  | 1.432(2) |
| C8                                                                                     | C9  | 1.430(2) | C9                                                                                     | C10 | 1.411(2) |
| C9                                                                                     | C10 | 1.413(1) | C10                                                                                    | C6  | 1.456(2) |
| C10                                                                                    | C6  | 1.454(2) | C9                                                                                     | C11 | 1.429(2) |
| C9                                                                                     | C11 | 1.429(2) | C11                                                                                    | C12 | 1.350(2) |
| C11                                                                                    | C12 | 1.348(2) | C12                                                                                    | C13 | 1.425(2) |
| C12                                                                                    | C13 | 1.430(1) | C13                                                                                    | C14 | 1.430(2) |
| C13                                                                                    | C14 | 1.430(1) | C14                                                                                    | C10 | 1.457(2) |
| C14                                                                                    | C10 | 1.458(2) | C13                                                                                    | C15 | 1.404(2) |
| C13                                                                                    | C15 | 1.404(2) | C15                                                                                    | C16 | 1.383(2) |
| C15                                                                                    | C16 | 1.381(1) | C16                                                                                    | C17 | 1.415(2) |
| C16                                                                                    | C17 | 1.415(2) | C17                                                                                    | C18 | 1.380(2) |
| C17                                                                                    | C18 | 1.380(2) | C18                                                                                    | C14 | 1.416(2) |
| C18                                                                                    | C14 | 1.414(1) | C16                                                                                    | C19 | 1.456(2) |
| C16                                                                                    | C19 | 1.435(2) | C19                                                                                    | O1  | 1.228(2) |
| C19                                                                                    | N1  | 1.143(2) | C17                                                                                    | O2  | 1.360(2) |
| C17                                                                                    | O1  | 1.349(1) | O2                                                                                     | O1  | 2.674(2) |
| O1                                                                                     | O2  | 2.658(1) |                                                                                        |     |          |
| O2                                                                                     | C20 | 1.396(2) |                                                                                        |     |          |
| Dihedral angle between the planes<br>C1-C2-C3-C4-C5-C6 and C13-C14-<br>C15-C16-C17-C18 |     |          | Dihedral angle between the planes<br>C1-C2-C3-C4-C5-C6 and C13-C14-<br>C15-C16-C17-C18 |     |          |
|                                                                                        |     | 22.51    |                                                                                        |     | 27.12    |

**Table S3.** Selected bond distances (Å) and dihedral angle between two aromatic helicene planes for compounds **8** and **9**.

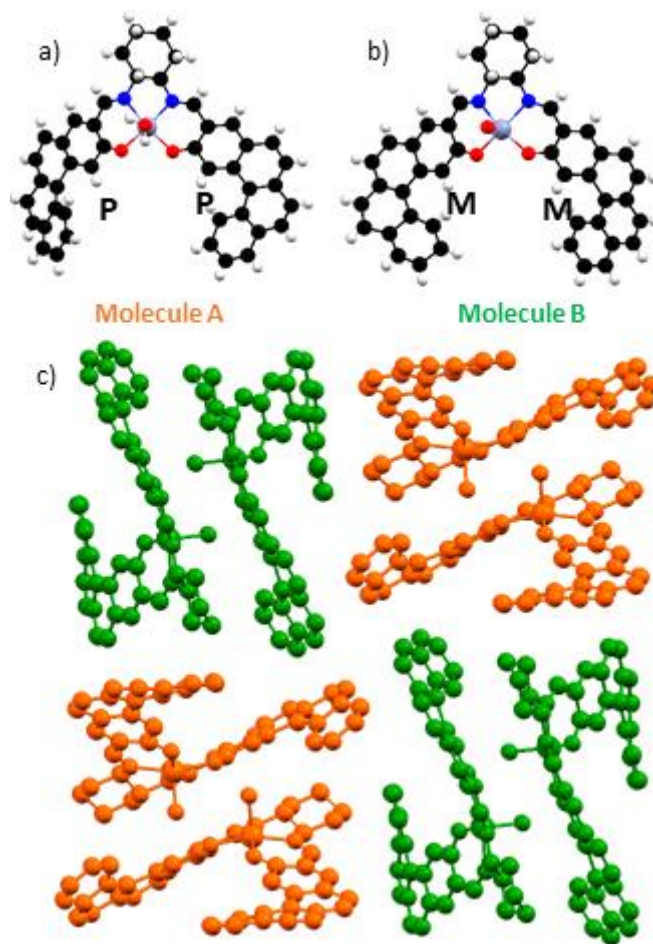

**Figure S4.** X-ray structure of complex **1** (Carbon: black ; Nitrogen : blue ; Oxygen : red ; Zinc : grey ; Hydrogen : white) and packing diagram along *b* for compound **1** (hydrogen atoms omitted for the sake of clarity).

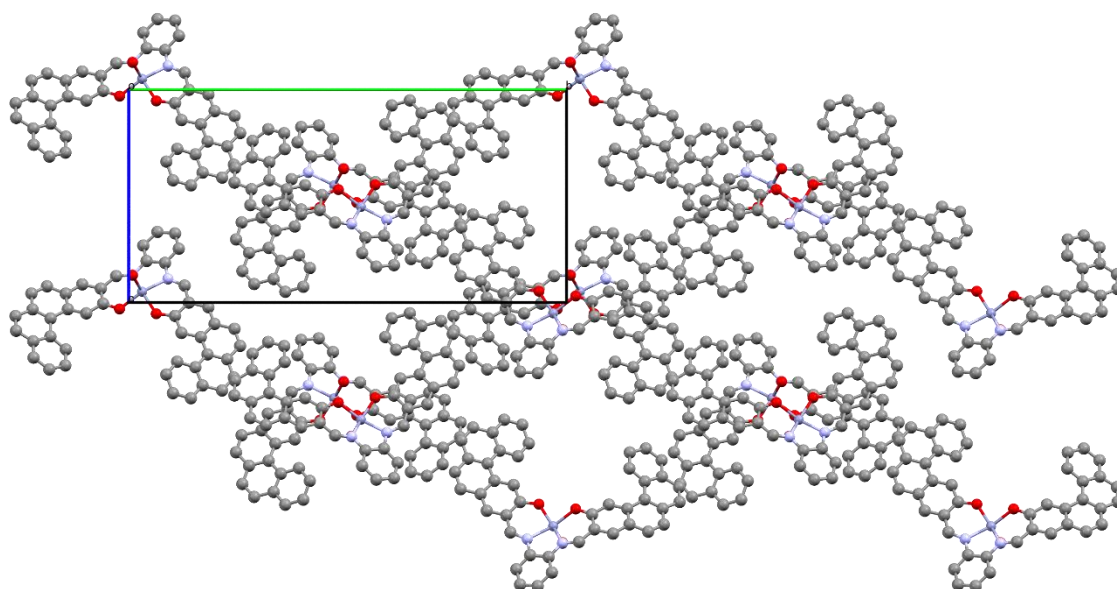

**Figure S5.** Packing diagram along *a* for compound **4** (hydrogen atoms and solvent molecule omitted for the sake of clarity).



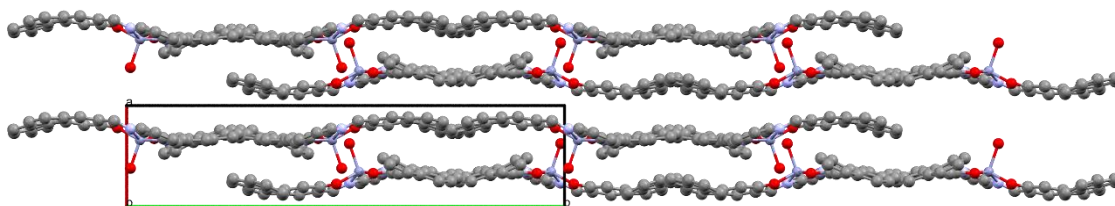

**Figure S6.** Packing diagram along *c* for compound **4** (hydrogen atoms and solvent molecule omitted for the sake of clarity).

| <b>1A (R,R/P,P)</b>                                                                                 |     |    |          | <b>1B (R,R/M,M)</b>                                                                                 |     |    |         | <b>4</b>                                                                                            |     |    |          |
|-----------------------------------------------------------------------------------------------------|-----|----|----------|-----------------------------------------------------------------------------------------------------|-----|----|---------|-----------------------------------------------------------------------------------------------------|-----|----|----------|
| O1                                                                                                  | Zn1 | N1 | 91(1)    | O4                                                                                                  | Zn2 | N3 | 90(1)   | N1                                                                                                  | Zn1 | O2 | 90.5(3)  |
| N1                                                                                                  | Zn1 | N2 | 80(1)    | N3                                                                                                  | Zn2 | N4 | 79(1)   | N1                                                                                                  | Zn1 | N2 | 79.6(3)  |
| N2                                                                                                  | Zn1 | O2 | 90(1)    | N4                                                                                                  | Zn2 | O5 | 90(1)   | N2                                                                                                  | Zn1 | O3 | 89.2(2)  |
| O2                                                                                                  | Zn1 | O1 | 93(1)    | O5                                                                                                  | Zn2 | O4 | 96(1)   | O3                                                                                                  | Zn1 | O2 | 89.1(2)  |
| O1                                                                                                  | Zn1 | O3 | 101.0(9) | O4                                                                                                  | Zn2 | O6 | 96.0(9) | O2                                                                                                  | Zn1 | O4 | 106.3(2) |
| N1                                                                                                  | Zn1 | O3 | 102(1)   | N3                                                                                                  | Zn2 | O6 | 94(1)   | O3                                                                                                  | Zn1 | O4 | 100.7(2) |
| N2                                                                                                  | Zn1 | O3 | 102(1)   | N4                                                                                                  | Zn2 | O6 | 114(1)  | N2                                                                                                  | Zn1 | O4 | 100.5(3) |
| O2                                                                                                  | Zn1 | O3 | 93.3(9)  | O5                                                                                                  | Zn2 | O6 | 98.0(9) | N1                                                                                                  | Zn1 | O4 | 104.2(3) |
| Dihedral angle<br>between the planes<br>C1-C2-C3-C4-C5-C6<br>and C13-C14-C15-C16-<br>C17-C18        |     |    |          | Dihedral angle<br>between the planes<br>C45-C46-C47-C48-C49-<br>C50 and C57-C58-C59-<br>C60-C61-C62 |     |    |         | Dihedral angle<br>between the planes<br>C5-C6-C7-C8-C9-C10<br>and C17-C18-C19-<br>C20-C21-C22       |     |    |          |
| Dihedral angle<br>between the planes<br>C27-C28-C29-C30-C31-<br>C32 and C39-C40-C41-<br>C42-C43-C44 |     |    |          | Dihedral angle<br>between the planes<br>C71-C72-C73-C74-C75-<br>C76 and C83-C84-C85-<br>C86-C87-C88 |     |    |         | Dihedral angle<br>between the planes<br>C31-C32-C33-C34-<br>C35-C36 and C43-<br>C44-C45-C46-C47-C48 |     |    |          |
| 23.74                                                                                               |     |    |          | 33.51                                                                                               |     |    |         | 25.64                                                                                               |     |    |          |
| 29.88                                                                                               |     |    |          | 19.42                                                                                               |     |    |         | 28.16                                                                                               |     |    |          |

**Table S4.** Selected bond angles (°) around the Zn atom and dihedral angle between two aromatic helicene planes for compounds **1** and **4**.

## DFT and TD-DFT calculations

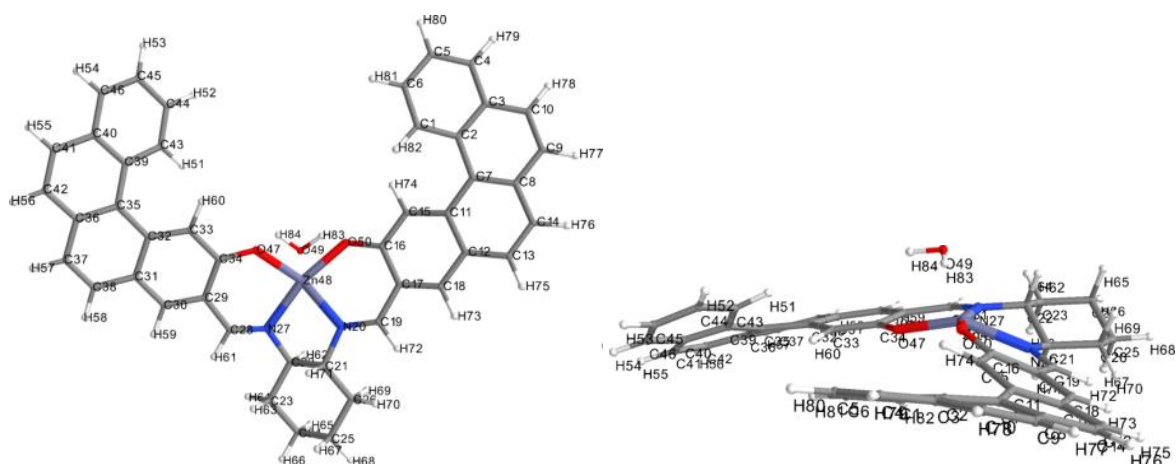

Figure S7. Chemical structure diagram of **1A** (*R,R/P,P*) with atomic numbering from two points of view.

| <b>1A (<i>R,R/P,P</i>)</b>                                       |                           |
|------------------------------------------------------------------|---------------------------|
| <b>Total molecular energy</b>                                    | -3807.62956 Hartrees      |
| <b>HOMO number</b>                                               | 183                       |
| <b>LUMO+1 energies</b>                                           | -1.81 eV                  |
| <b>LUMO energies</b>                                             | -1.98 eV                  |
| <b>HOMO energies</b>                                             | -5.30 eV                  |
| <b>HOMO-1 energies</b>                                           | -5.40 eV                  |
| <b>Mean Mulliken atomic charge and standard deviation</b>        | 0.0000 e- 0.1504 e-       |
| <b>Atoms with negatives charges under the standard deviation</b> | <b>N° Mulliken charge</b> |
|                                                                  | O 50 -0.502               |
|                                                                  | O 47 -0.476               |
|                                                                  | N 20 -0.337               |
|                                                                  | N 27 -0.335               |
|                                                                  | O 49 -0.276               |
|                                                                  | C 33 -0.163               |
|                                                                  | C 15 -0.161               |
| <b>Atoms with positives charges over the standard deviation</b>  | <b>N° Mulliken charge</b> |
|                                                                  | H 84 +0.188               |
|                                                                  | H 83 +0.194               |
|                                                                  | C 34 +0.263               |
|                                                                  | C 16 +0.289               |
|                                                                  | Zn 48 +0.842              |
| <b>Geometry optimization specific results</b>                    |                           |
| <b>Converged nuclear repulsion energy</b>                        | 6594.70450 Hartrees       |
| <b>Frequency and Thermochemistry specific results</b>            |                           |
| <b>Sum of electronic and zero-point energy</b>                   | -3806.95391 Hartrees      |
| <b>Sum of electronic and thermal energies at 298.15 K</b>        | -3806.91444 Hartrees      |
| <b>Enthalpy at 298.15 K</b>                                      | -3806.91350 Hartrees      |
| <b>Gibbs free energy at 298.15 K</b>                             | -3807.02704 Hartrees      |
| <b>Entropy at 298.15 K</b>                                       | 0.00038 Hartrees          |

Table S5. Calculation report for **1A** (*R,R/P,P*).

| Frequency | Intensity | Symmetry |
|-----------|-----------|----------|
| 3854      | 174       | A        |
| 3654      | 394       | A        |

|      |      |   |
|------|------|---|
| 1750 | 519  | A |
| 1727 | 1411 | A |
| 1715 | 103  | A |
| 1712 | 620  | A |
| 1693 | 105  | A |
| 1690 | 320  | A |
| 1683 | 327  | A |
| 1676 | 176  | A |
| 1675 | 291  | A |
| 1624 | 65   | A |
| 1575 | 88   | A |
| 1565 | 109  | A |
| 1551 | 171  | A |
| 1539 | 60   | A |
| 1504 | 168  | A |
| 1488 | 83   | A |
| 1397 | 122  | A |
| 1236 | 72   | A |
| 1229 | 78   | A |
| 1199 | 122  | A |
| 1197 | 52   | A |
| 786  | 74   | A |

**Table S6.** Most intense (> 20 km/mol) molecular vibrations in wavenumbers for **1A (R,R/P,P)**.

| E.S. | Symmetry  | nm  | cm <sup>-1</sup> | Oscillator str. | Rotational str. | Tozer | dCT    | qCT  |
|------|-----------|-----|------------------|-----------------|-----------------|-------|--------|------|
| 1    | Singlet-A | 460 | 21714            | 0.005           | -115.291        | 0.52  | 618.92 | 0.62 |
| 2    | Singlet-A | 450 | 22188            | 0.089           | 104.404         | 0.62  | 353.53 | 0.59 |
| 3    | Singlet-A | 422 | 23644            | 0.009           | -10.359         | 0.54  | 438.09 | 0.6  |
| 4    | Singlet-A | 397 | 25161            | 0.006           | 0.666           | 0.44  | 731.92 | 0.76 |
| 5    | Singlet-A | 364 | 27460            | 0.267           | -202.261        | 0.53  | 361.94 | 0.46 |
| 6    | Singlet-A | 355 | 28102            | 0.165           | 108.45          | 0.64  | 122.6  | 0.39 |
| 7    | Singlet-A | 338 | 29502            | 0.007           | 7.071           | 0.54  | 440.81 | 0.5  |
| 8    | Singlet-A | 330 | 30294            | 0.005           | -13.906         | 0.45  | 449.43 | 0.5  |
| 9    | Singlet-A | 329 | 30375            | 0.151           | 64.346          | 0.55  | 317.46 | 0.39 |
| 10   | Singlet-A | 326 | 30626            | 0.012           | -9.694          | 0.43  | 915.3  | 0.46 |
| 11   | Singlet-A | 324 | 30807            | 0.03            | -0.163          | 0.53  | 344.57 | 0.42 |
| 12   | Singlet-A | 319 | 31309            | 0.426           | -221.872        | 0.46  | 691.45 | 0.35 |
| 13   | Singlet-A | 317 | 31451            | 0.003           | -3.263          | 0.39  | 561.66 | 0.49 |
| 14   | Singlet-A | 312 | 31987            | 0.637           | 284.714         | 0.53  | 308.06 | 0.32 |
| 15   | Singlet-A | 310 | 32249            | 0.027           | 16.884          | 0.45  | 836.72 | 0.66 |

**Table S7.** Results concerning the calculated mono-electronic excitations for **1A (R,R/P,P)**.

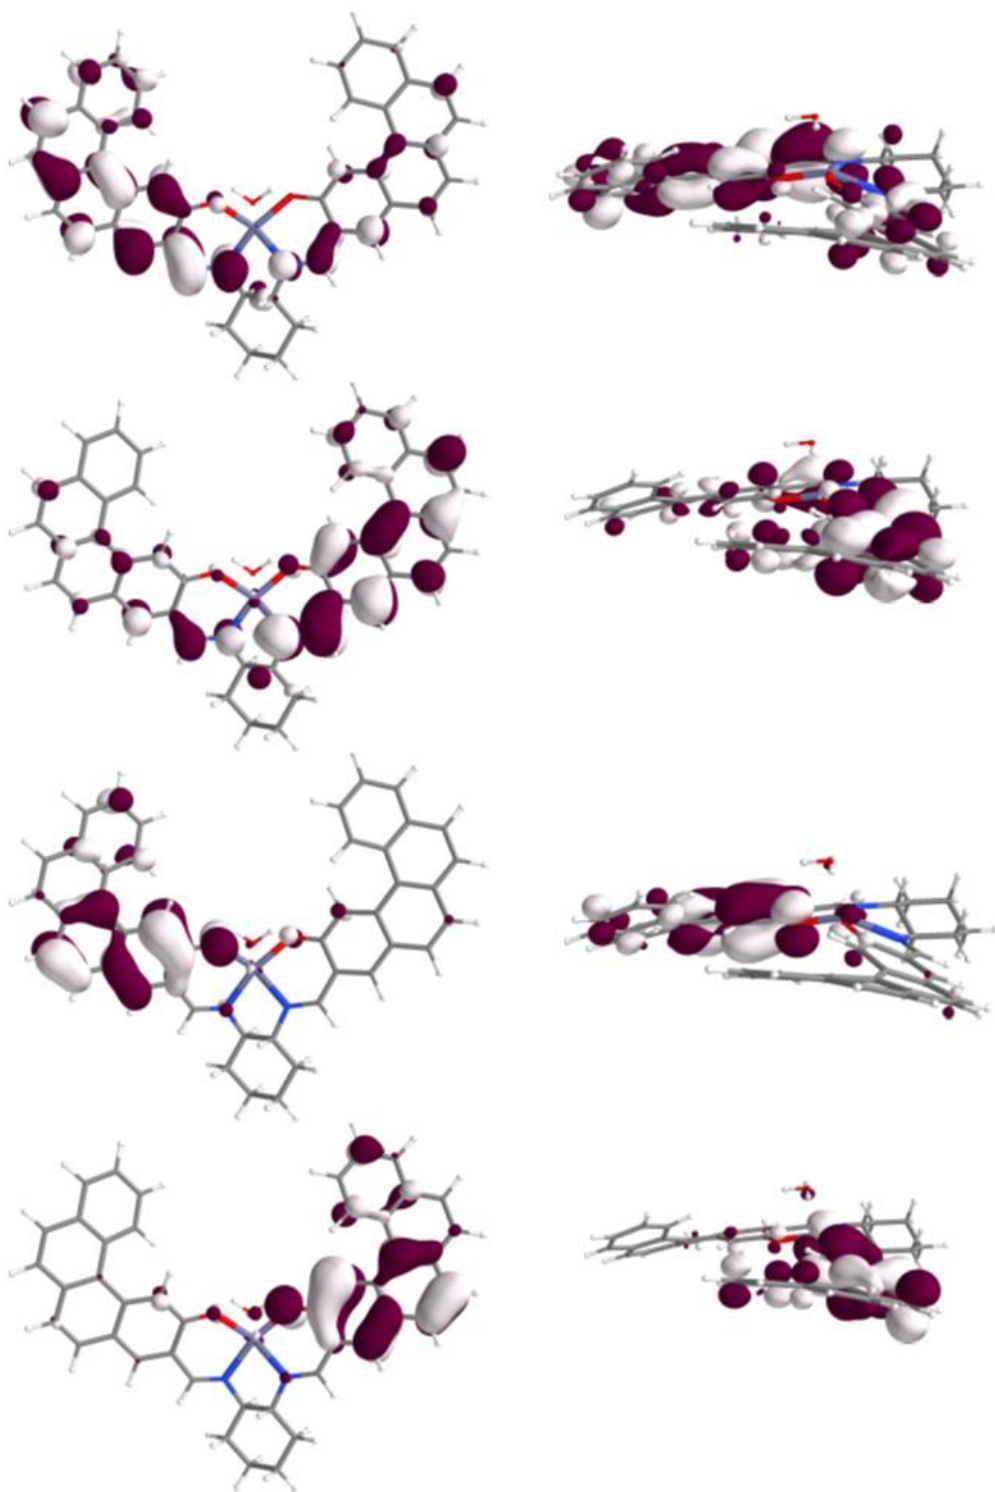

**Figure S8.** HOMO-1, HOMO, LUMO, and LUMO+1 (from bottom to top, two views each) for **1A** (*R,R/P,P*).

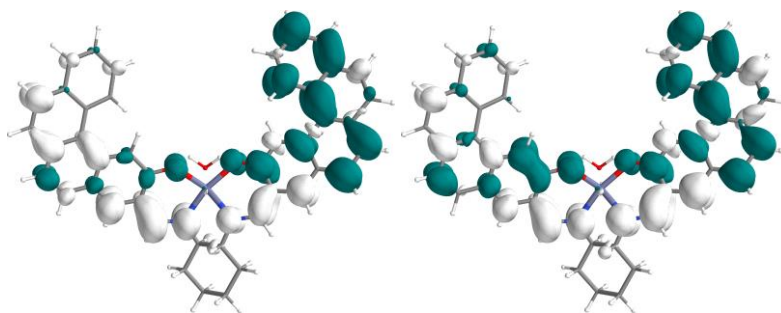

**Figure S9.** Representation of the Electron Density Difference (S1-S0 left) and (S2-S0 right) for **1A (R,R/P,P)**. The excited electron and the hole regions are indicated by blue and white surfaces, respectively.

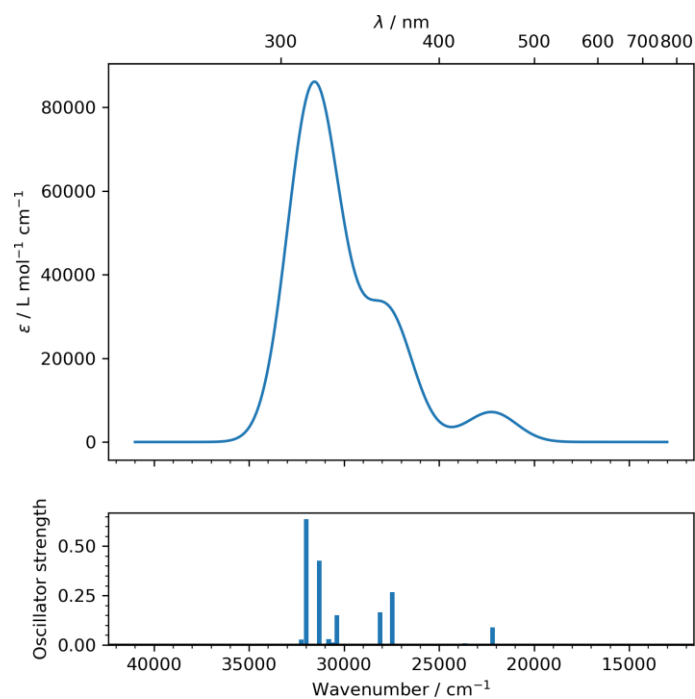

**Figure S10.** Calculated UV absorption spectrum for **1A (R,R/P,P)** with a gaussian broadening (FWHM = 3000  $\text{cm}^{-1}$ ).

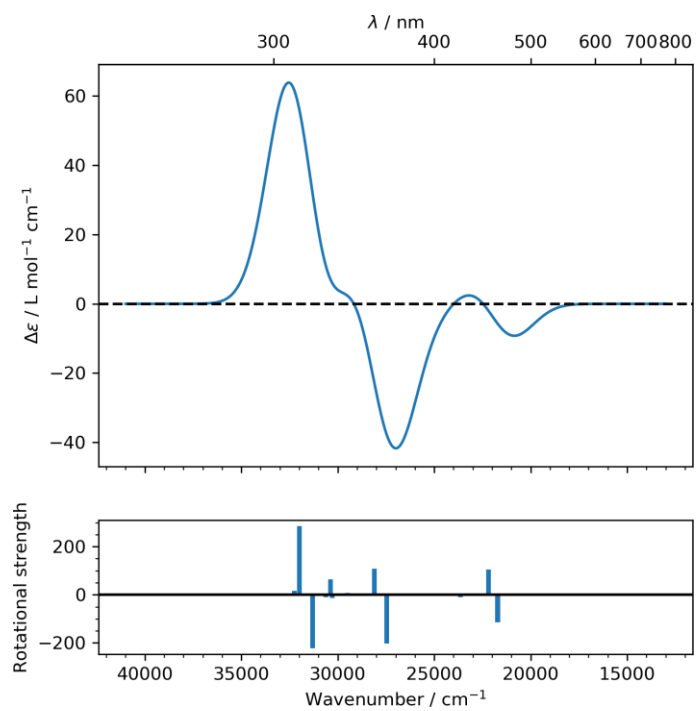

**Figure S11.** Calculated Circular Dichroism spectrum for **1A (R,R/P,P)** with a gaussian broadening (FWHM = 3000  $\text{cm}^{-1}$ ).

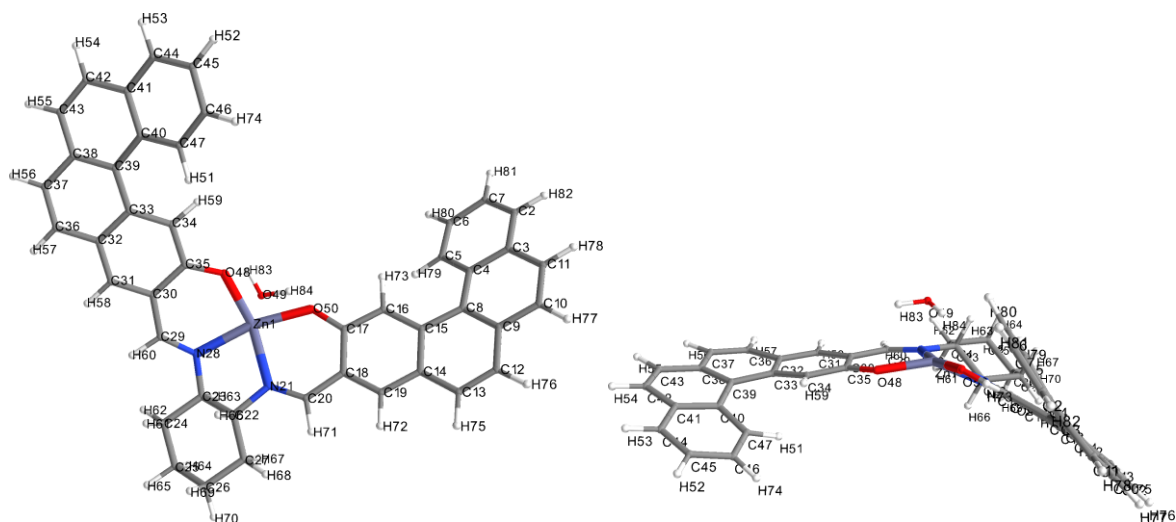

Figure S12. Chemical structure diagram of **1B** (*R,R/M,M*) with atomic numbering from two points of view.

**1B** (*R,R/M,M*)

|                                                                  |                           |
|------------------------------------------------------------------|---------------------------|
| <b>Total molecular energy</b>                                    | -3807.62944 Hartrees      |
| <b>HOMO number</b>                                               | 183                       |
| <b>LUMO+1 energies</b>                                           | -1.81 eV                  |
| <b>LUMO energies</b>                                             | -1.99 eV                  |
| <b>HOMO energies</b>                                             | -5.29 eV                  |
| <b>HOMO-1 energies</b>                                           | -5.40 eV                  |
| <b>Mean Mulliken atomic charge and standard deviation</b>        | 0.0000 e- 0.1505 e-       |
| <b>Atoms with negatives charges under the standard deviation</b> | <b>N° Mulliken charge</b> |
|                                                                  | O 50 -0.500               |
|                                                                  | O 48 -0.477               |
|                                                                  | N 21 -0.337               |
|                                                                  | N 28 -0.336               |
|                                                                  | O 49 -0.276               |
|                                                                  | C 16 -0.164               |
|                                                                  | C 34 -0.162               |
| <b>Atoms with positives charges over the standard deviation</b>  | <b>N° Mulliken charge</b> |
|                                                                  | H 83 +0.189               |
|                                                                  | H 84 +0.193               |
|                                                                  | C 35 +0.267               |
|                                                                  | C 17 +0.289               |
|                                                                  | Zn 1 +0.841               |
| <b>Geometry optimization specific results</b>                    |                           |
| <b>Converged nuclear repulsion energy</b>                        | 6583.11256 Hartrees       |
| <b>Frequency and Thermochemistry specific results</b>            |                           |
| <b>Sum of electronic and zero-point energy</b>                   | -3806.95373 Hartrees      |
| <b>Sum of electronic and thermal energies at 298.15 K</b>        | -3806.91426 Hartrees      |
| <b>Enthalpy at 298.15 K</b>                                      | -3806.91332 Hartrees      |
| <b>Gibbs free energy at 298.15 K</b>                             | -3807.02723 Hartrees      |
| <b>Entropy at 298.15 K</b>                                       | 0.00038 Hartrees          |

Table S8. Calculation report for **1B** (*R,R/M,M*).

| Frequencies | Intensity | Symmetry |
|-------------|-----------|----------|
| 3839        | 197       | A        |
| 3654        | 373       | A        |
| 1750        | 537       | A        |
| 1727        | 1420      | A        |
| 1715        | 102       | A        |
| 1712        | 644       | A        |
| 1693        | 94        | A        |
| 1690        | 342       | A        |
| 1683        | 335       | A        |
| 1676        | 171       | A        |
| 1675        | 309       | A        |
| 1624        | 70        | A        |
| 1575        | 92        | A        |
| 1565        | 104       | A        |
| 1551        | 178       | A        |
| 1539        | 53        | A        |
| 1504        | 171       | A        |
| 1489        | 81        | A        |
| 1398        | 125       | A        |
| 1328        | 50        | A        |
| 1299        | 53        | A        |
| 1236        | 72        | A        |

**Table S9.** Most intense (> 20 km/mol) molecular vibrations in wavenumbers for **1B (R,R/M,M)**.

| E.S. | Symmetry  | nm  | cm <sup>-1</sup> | Oscillator str. | Rotational str. | Tozer | dCT    | qCT  |
|------|-----------|-----|------------------|-----------------|-----------------|-------|--------|------|
| 1    | Singlet-A | 461 | 21659            | 0.014           | -261.431        | 0.5   | 660.55 | 0.63 |
| 2    | Singlet-A | 451 | 22162            | 0.084           | 203.027         | 0.62  | 346.83 | 0.59 |
| 3    | Singlet-A | 425 | 23516            | 0.009           | -8.579          | 0.53  | 499.98 | 0.61 |
| 4    | Singlet-A | 396 | 25221            | 0.006           | 6.688           | 0.41  | 756.34 | 0.78 |
| 5    | Singlet-A | 364 | 27420            | 0.272           | -292.413        | 0.53  | 296.38 | 0.48 |
| 6    | Singlet-A | 356 | 28030            | 0.175           | 142.882         | 0.63  | 209.68 | 0.42 |
| 7    | Singlet-A | 341 | 29271            | 0.002           | -3.679          | 0.52  | 515.96 | 0.55 |
| 8    | Singlet-A | 330 | 30226            | 0.001           | -6.392          | 0.48  | 331.39 | 0.54 |
| 9    | Singlet-A | 328 | 30400            | 0.185           | -544.048        | 0.54  | 289.91 | 0.42 |
| 10   | Singlet-A | 325 | 30696            | 0.031           | 73.714          | 0.51  | 738.16 | 0.44 |
| 11   | Singlet-A | 324 | 30791            | 0.037           | 31.674          | 0.44  | 701.48 | 0.43 |
| 12   | Singlet-A | 320 | 31223            | 0.232           | -339.116        | 0.38  | 846.68 | 0.39 |
| 13   | Singlet-A | 317 | 31490            | 0.218           | -389.484        | 0.3   | 895.78 | 0.49 |
| 14   | Singlet-A | 312 | 31983            | 0.576           | 722.044         | 0.51  | 315.56 | 0.34 |
| 15   | Singlet-A | 310 | 32172            | 0.05            | 67.78           | 0.34  | 855.81 | 0.70 |

**Table S10.** Results concerning the calculated mono-electronic excitations for **1B (R,R/M,M)**.



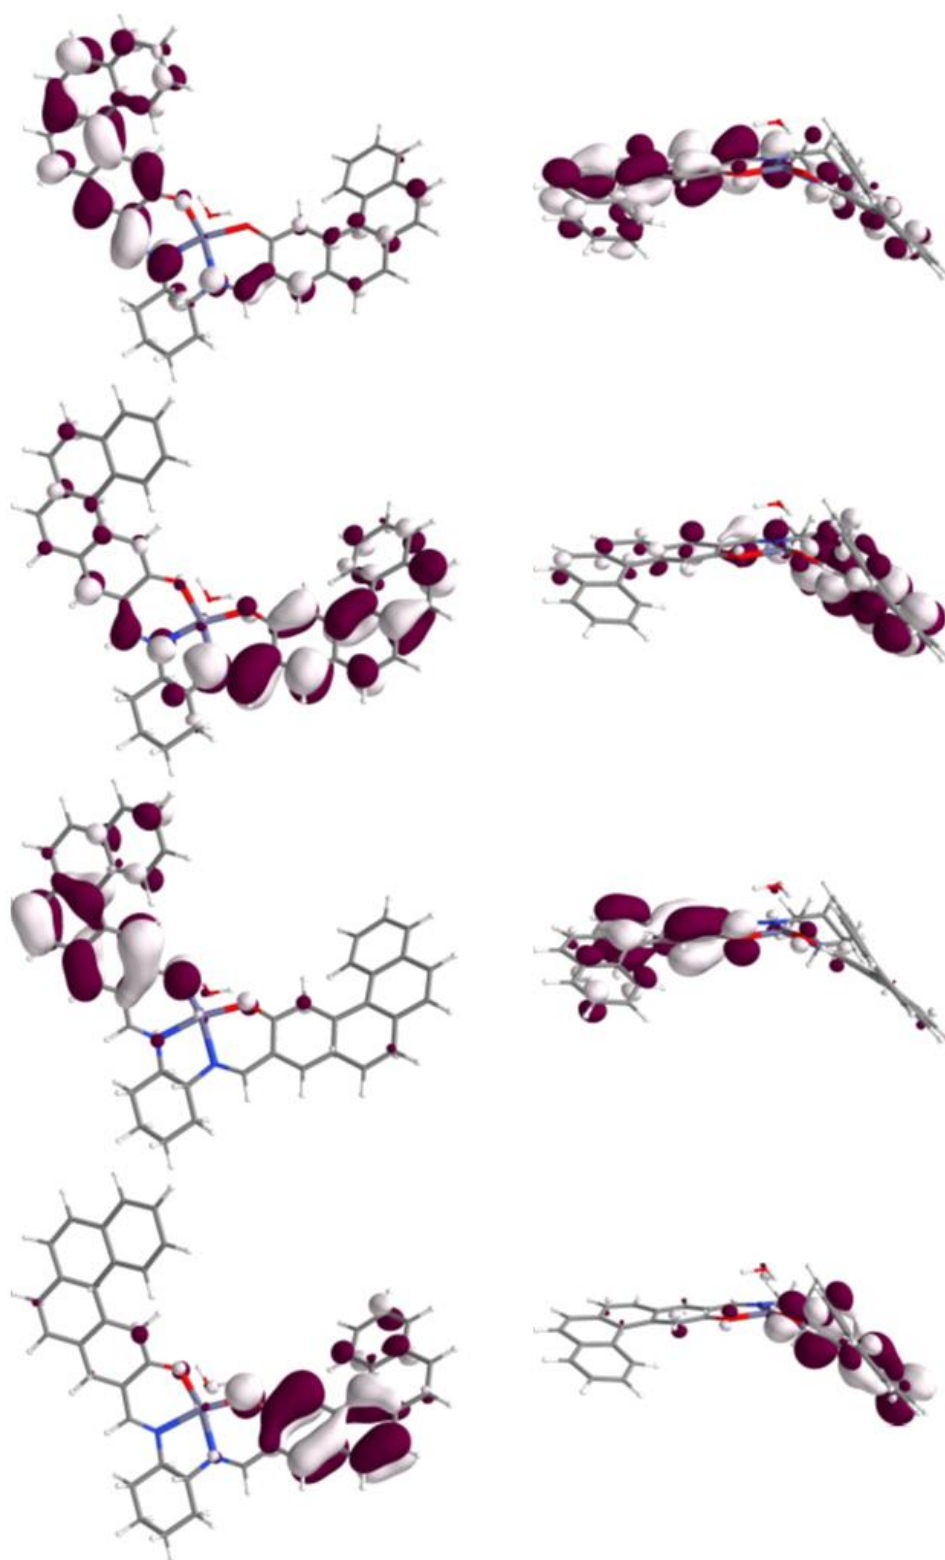

**Figure S13.** HOMO-1, HOMO, LUMO, and LUMO+1 (from bottom to top, two views each) for **1B** (*R,R/M,M*).

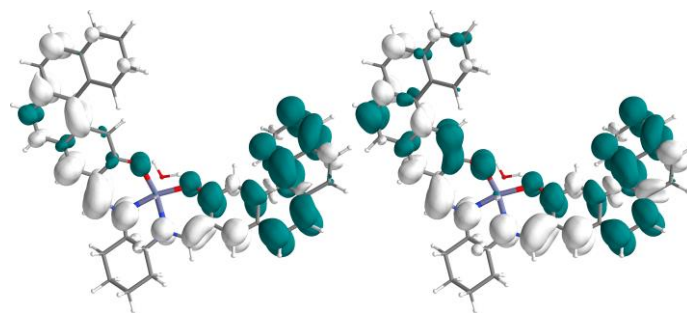

**Figure S14.** Representation of the Electron Density Difference (S1-S0 left) and (S2-S0 right) for **1B (R,R/M,M)**.

The excited electron and the hole regions are indicated by blue and white surfaces, respectively.

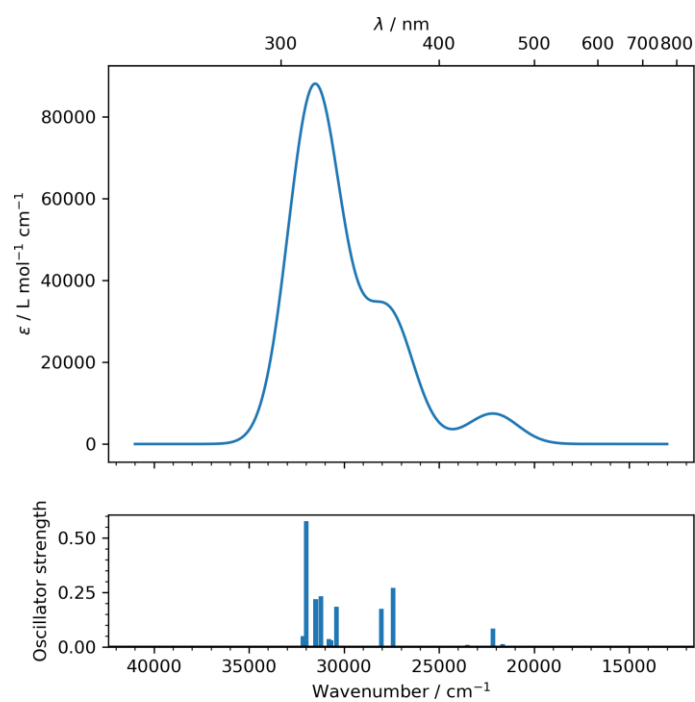

**Figure S15.** Calculated UV absorption spectrum for **1B (R,R/M,M)** with a gaussian broadening (FWHM = 3000 cm<sup>-1</sup>).

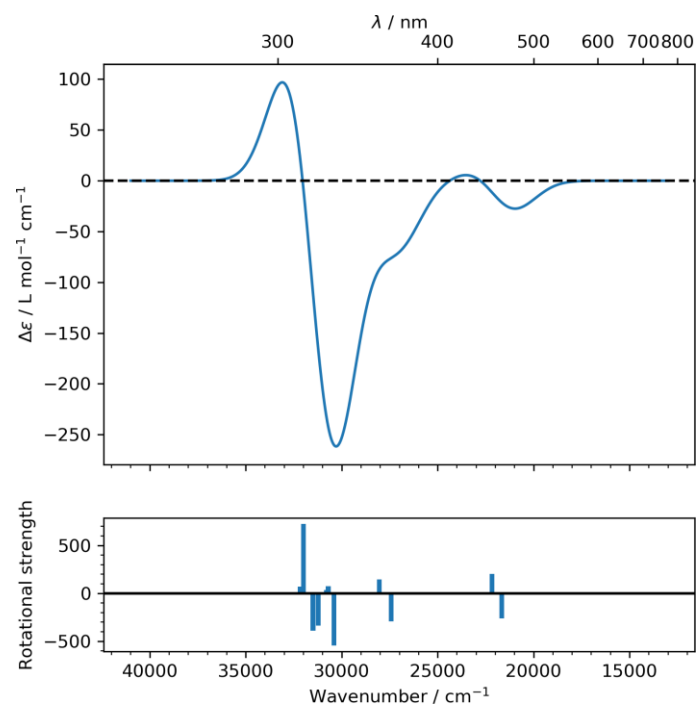

**Figure S16.** Calculated Circular Dichroism spectrum for **1B (R,R/M,M)** with a gaussian broadening (FWHM = 3000  $\text{cm}^{-1}$ ).

**<sup>1</sup>H NMR spectrum for compound 6.**

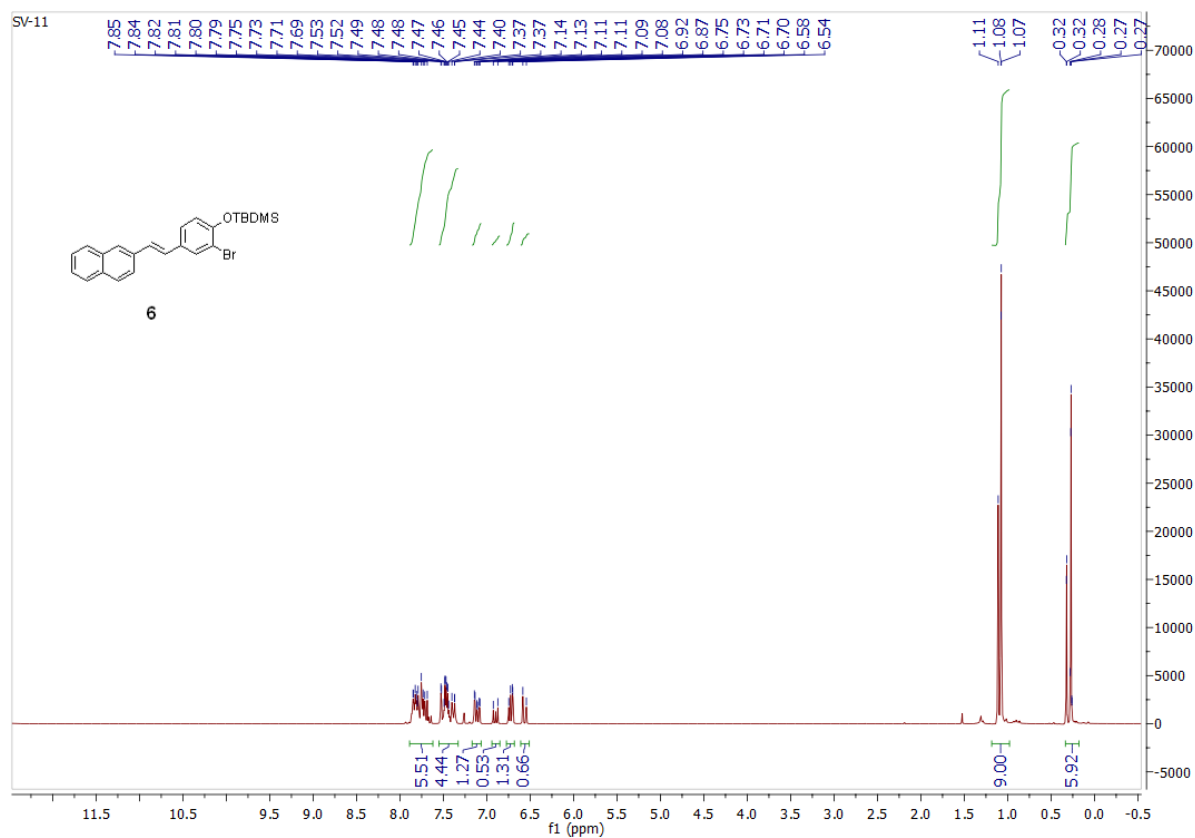

**<sup>13</sup>C NMR spectrum for compound 6.**

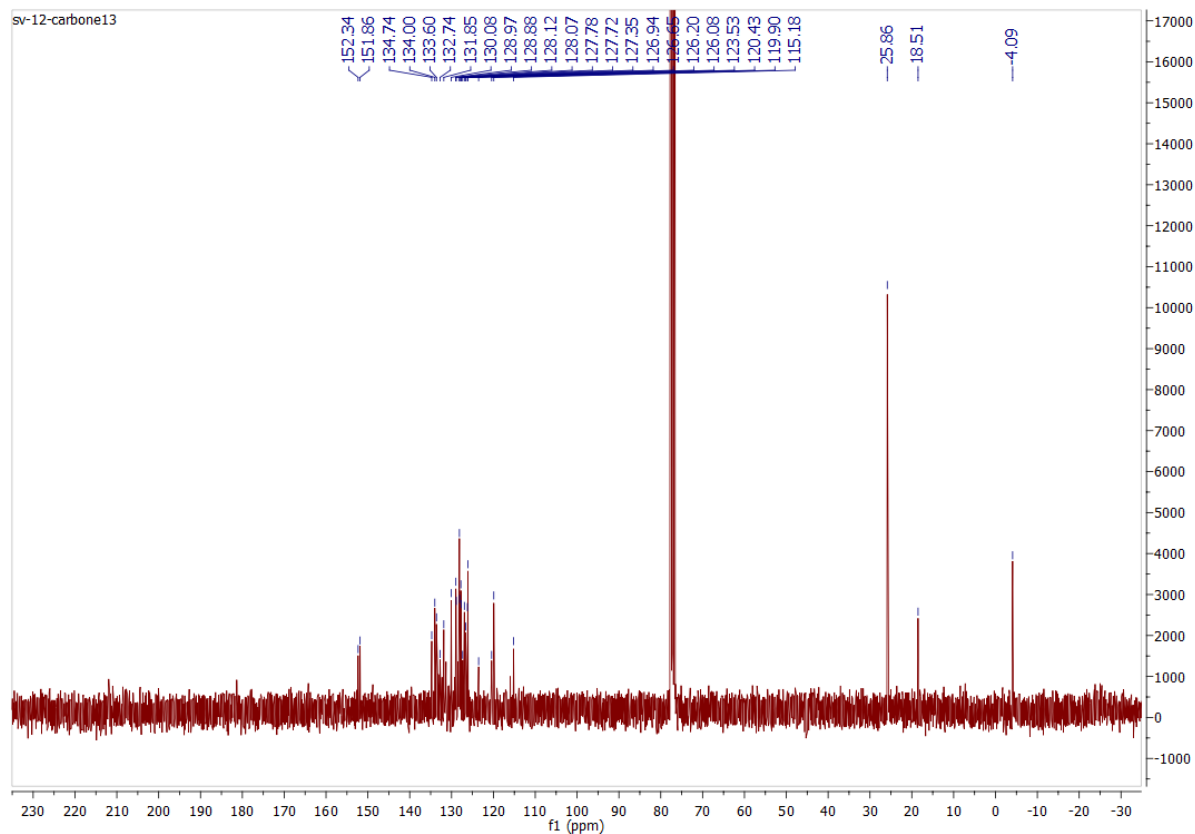

<sup>1</sup>H NMR spectrum for compound 7.

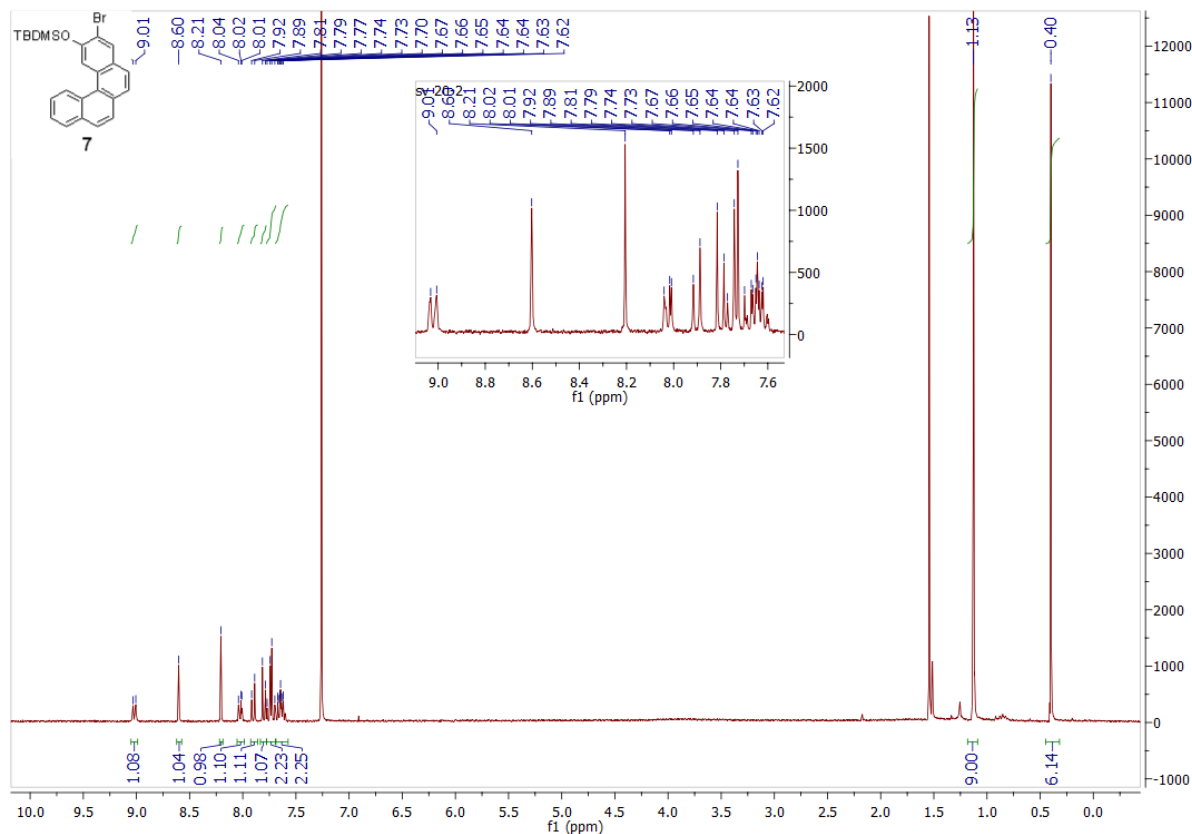

<sup>13</sup>C NMR spectrum for compound 7.

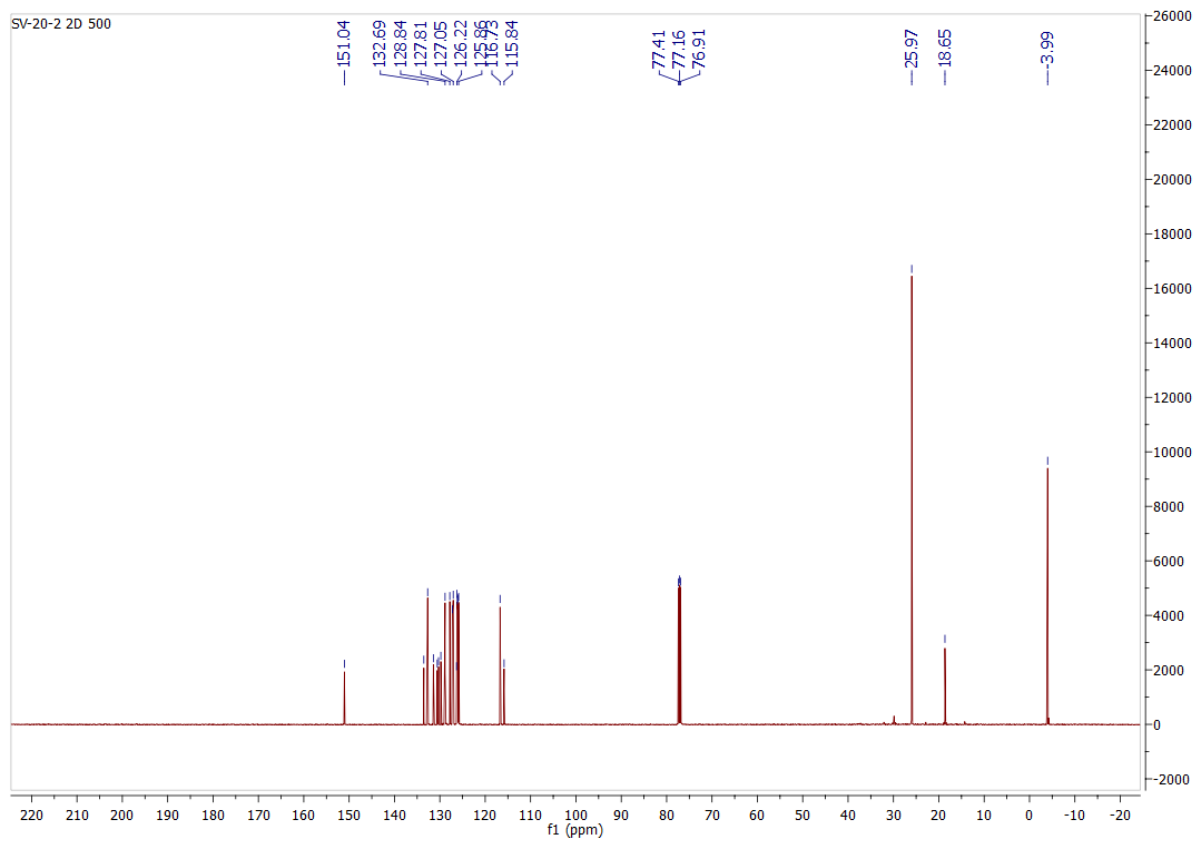

### <sup>1</sup>H NMR spectrum for compound 8.

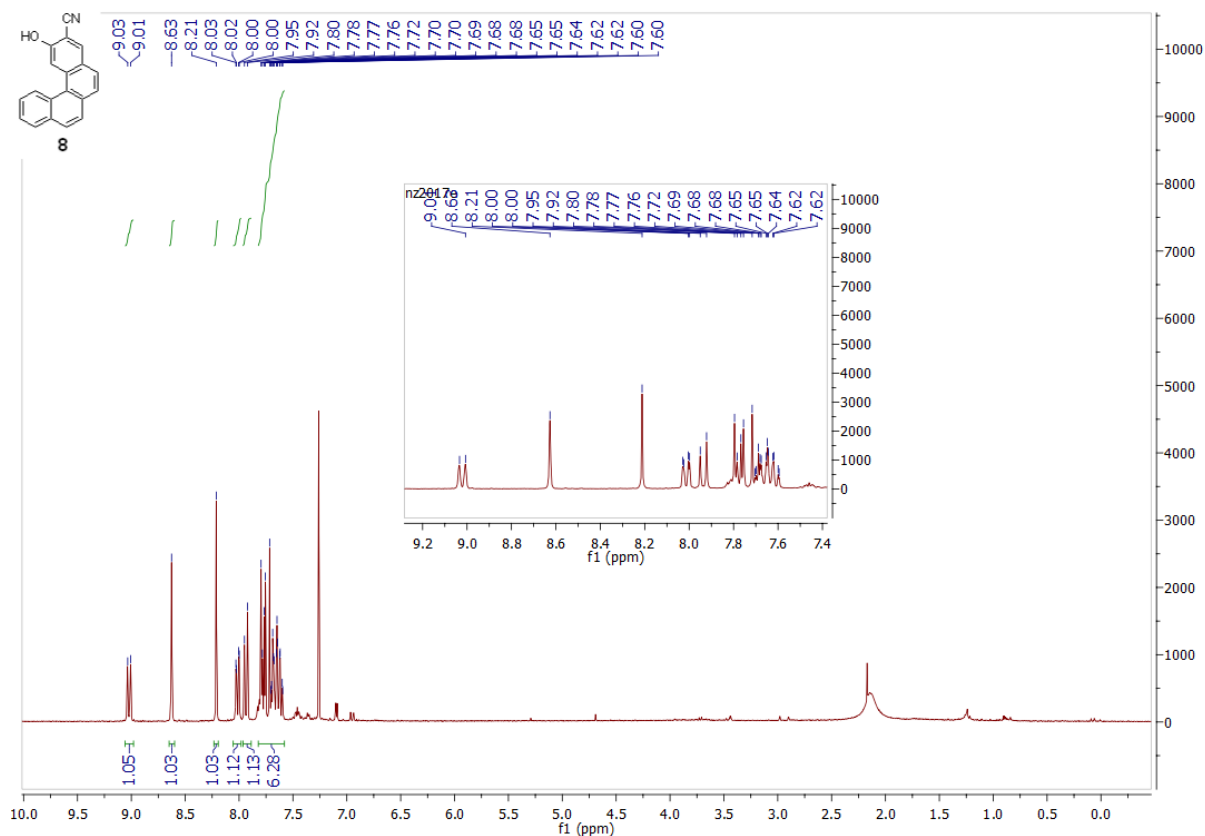

### <sup>13</sup>C NMR spectrum for compound 8.

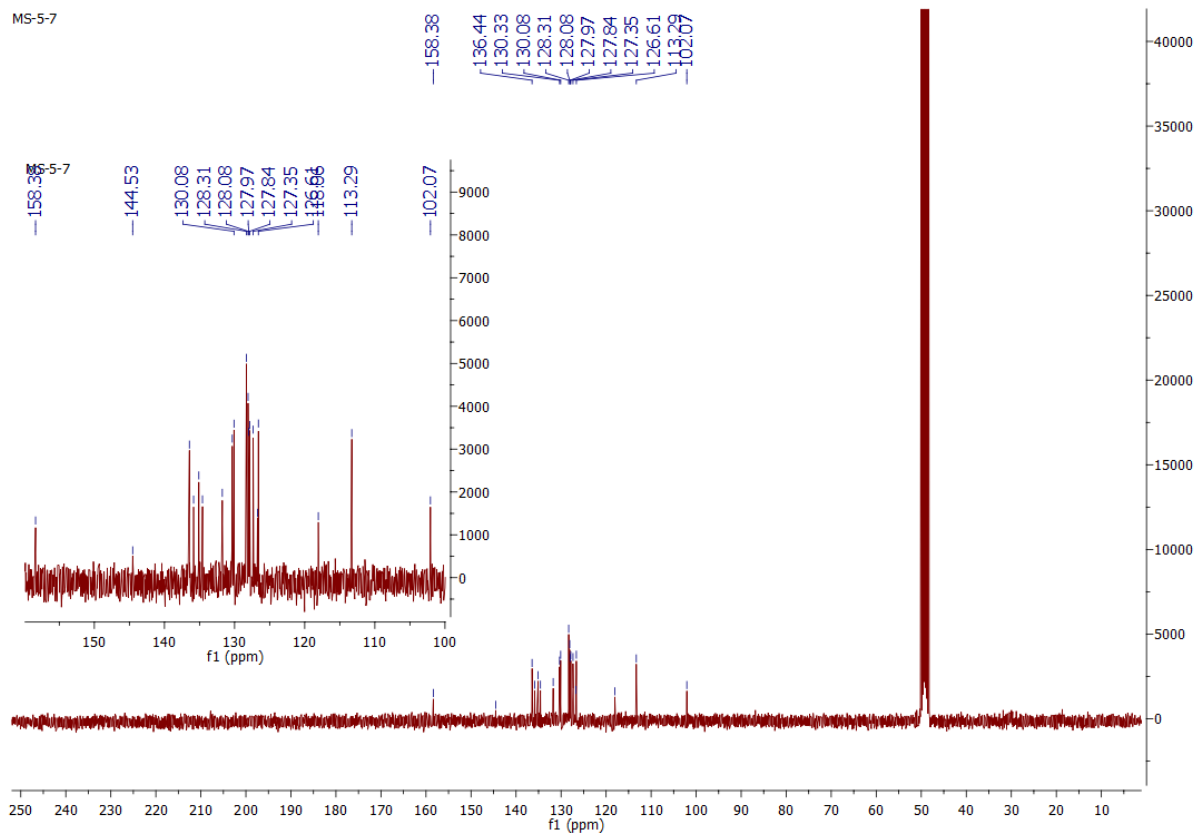

### <sup>1</sup>H NMR spectrum for compound 9.

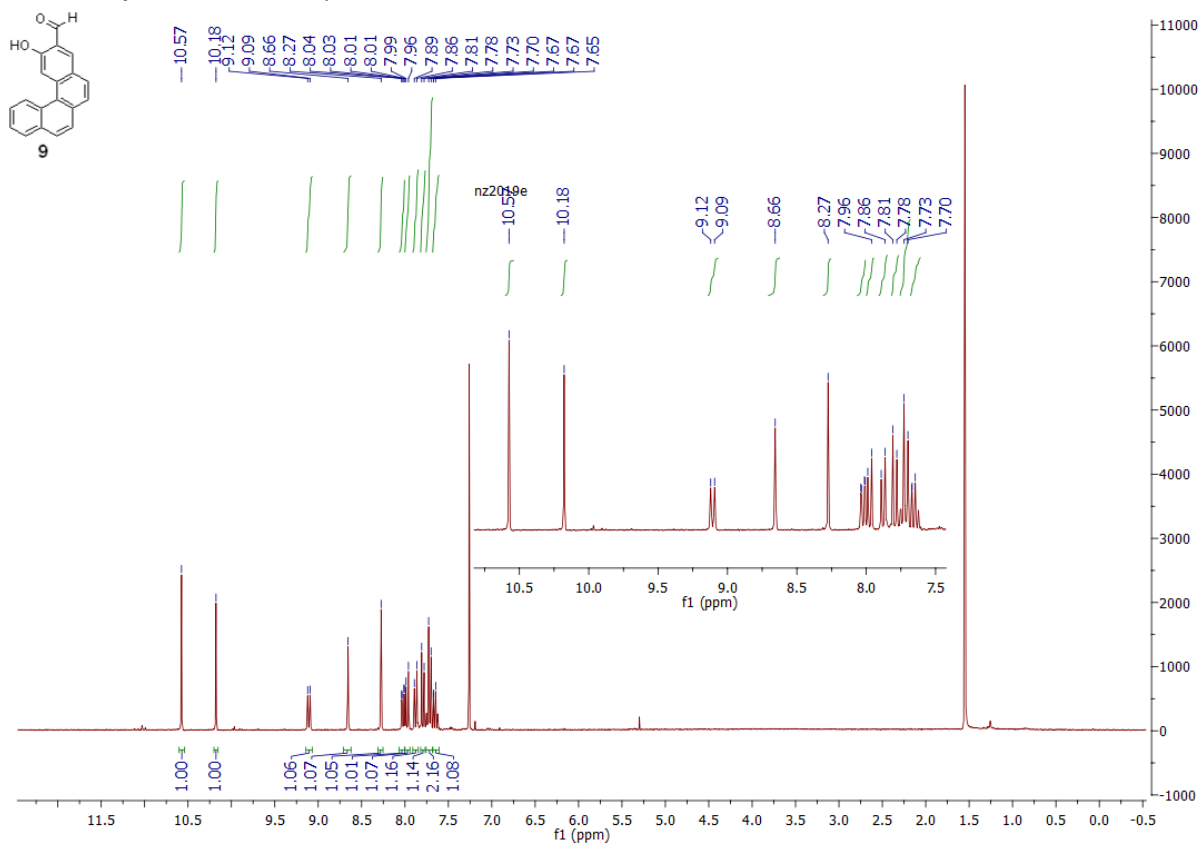

### <sup>13</sup>C NMR spectrum for compound 9.

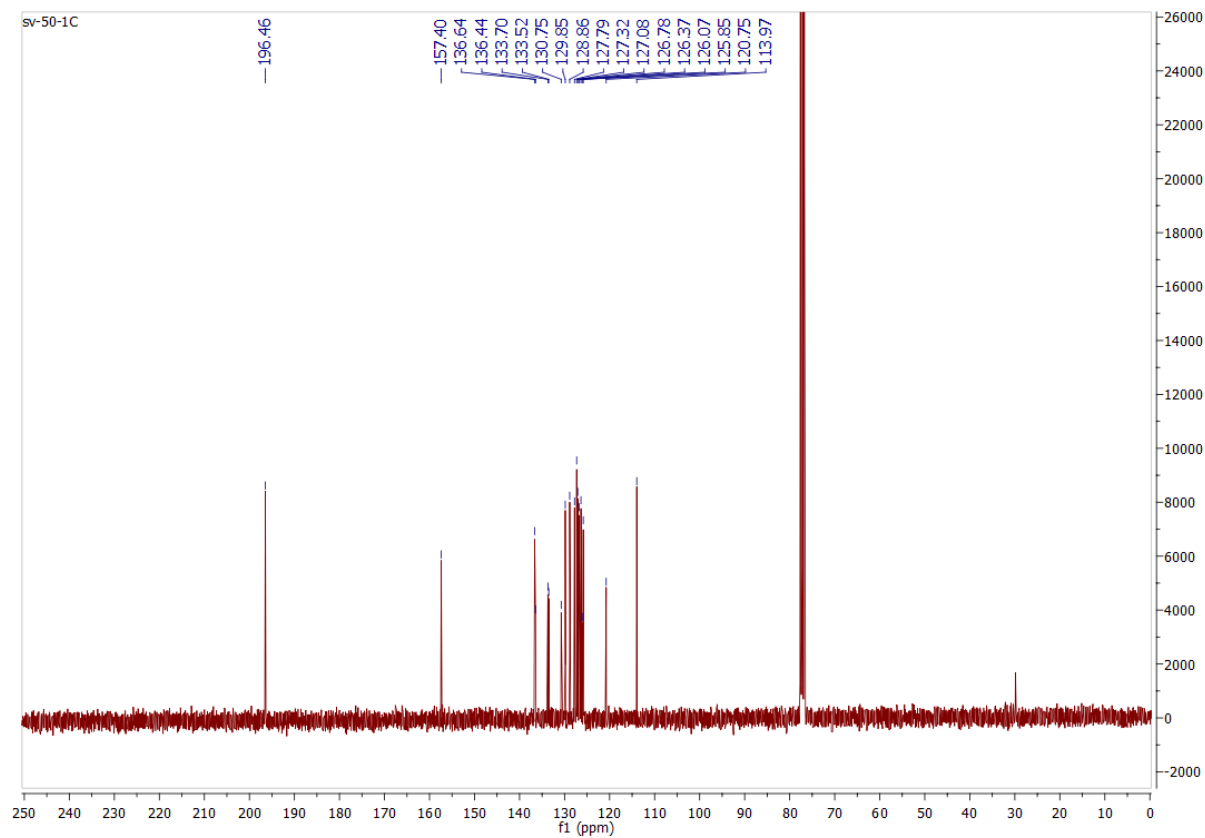

**<sup>1</sup>H NMR spectrum for compound 1.**

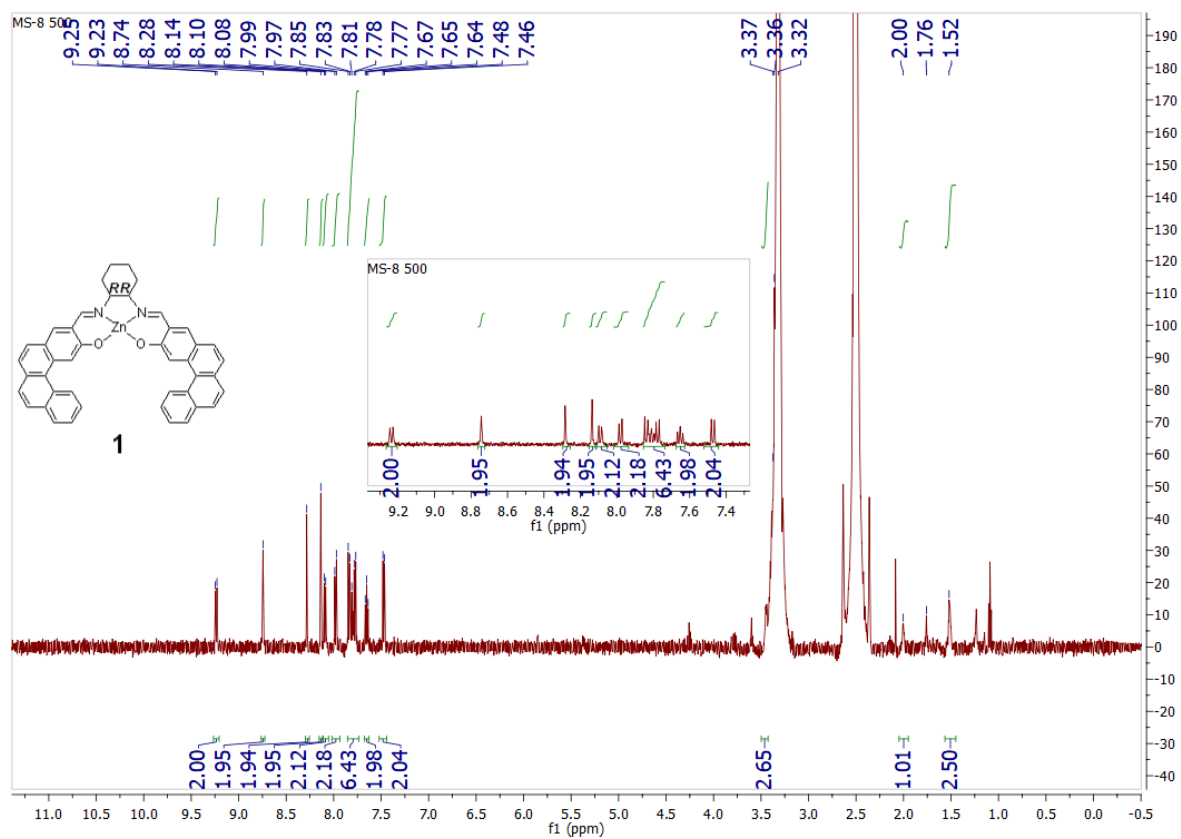

**COSY <sup>1</sup>H-<sup>1</sup>H 2-D NMR spectrum for compound 1 (aromatic region).**

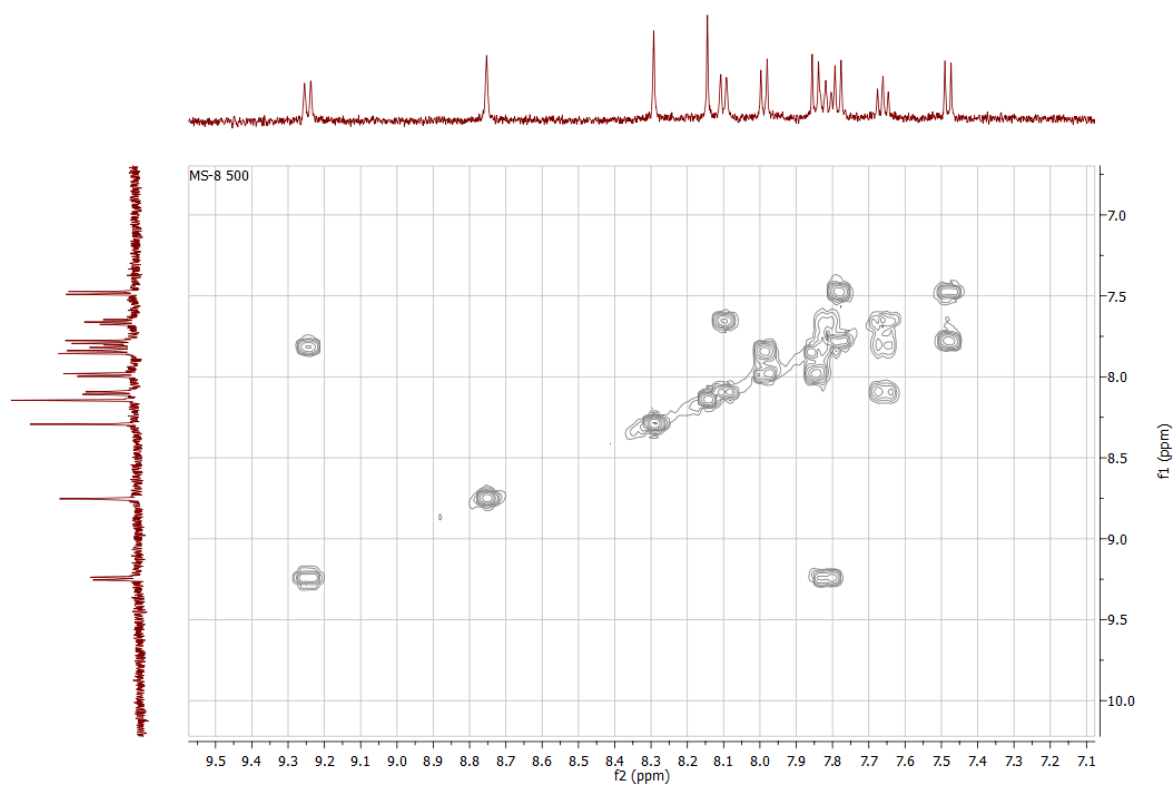



**COSY  $^1\text{H}$ - $^1\text{H}$  2-D NMR spectrum for compound 1 (aliphatic region).**

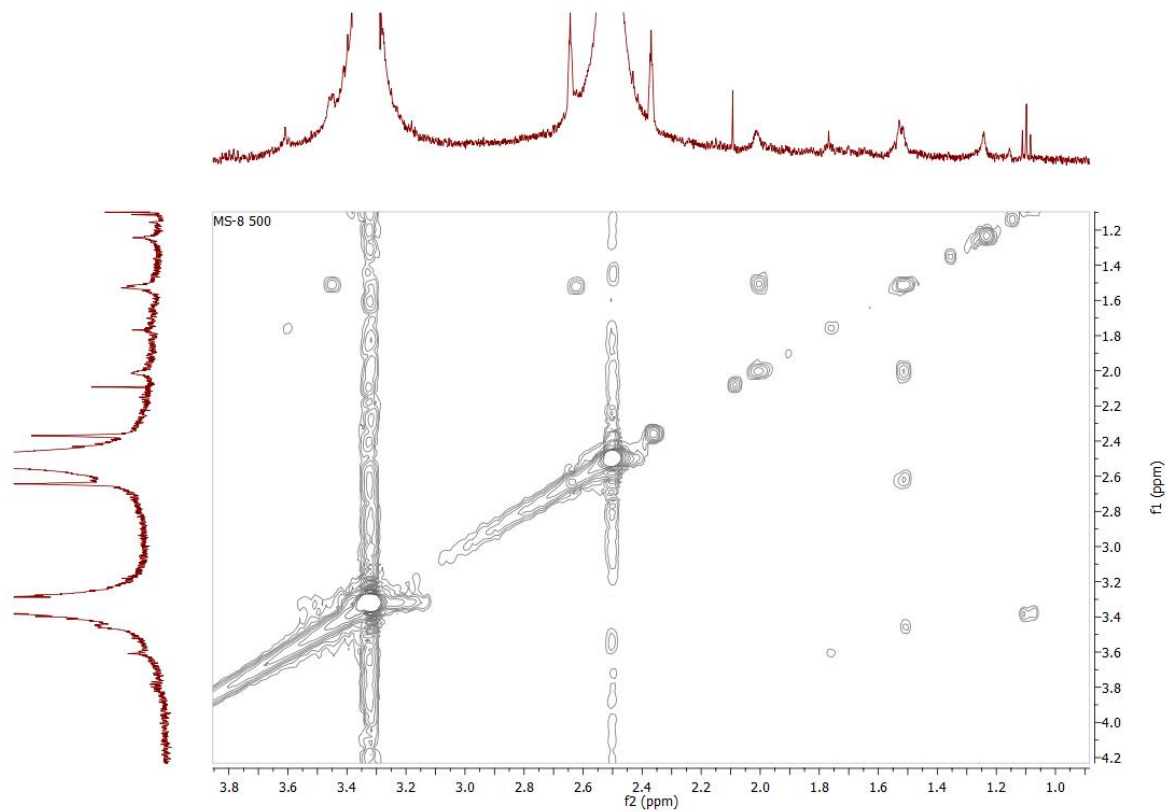

**HSQC  $^1\text{H}$ - $^{13}\text{C}$  2-D NMR spectrum for compound 1.**

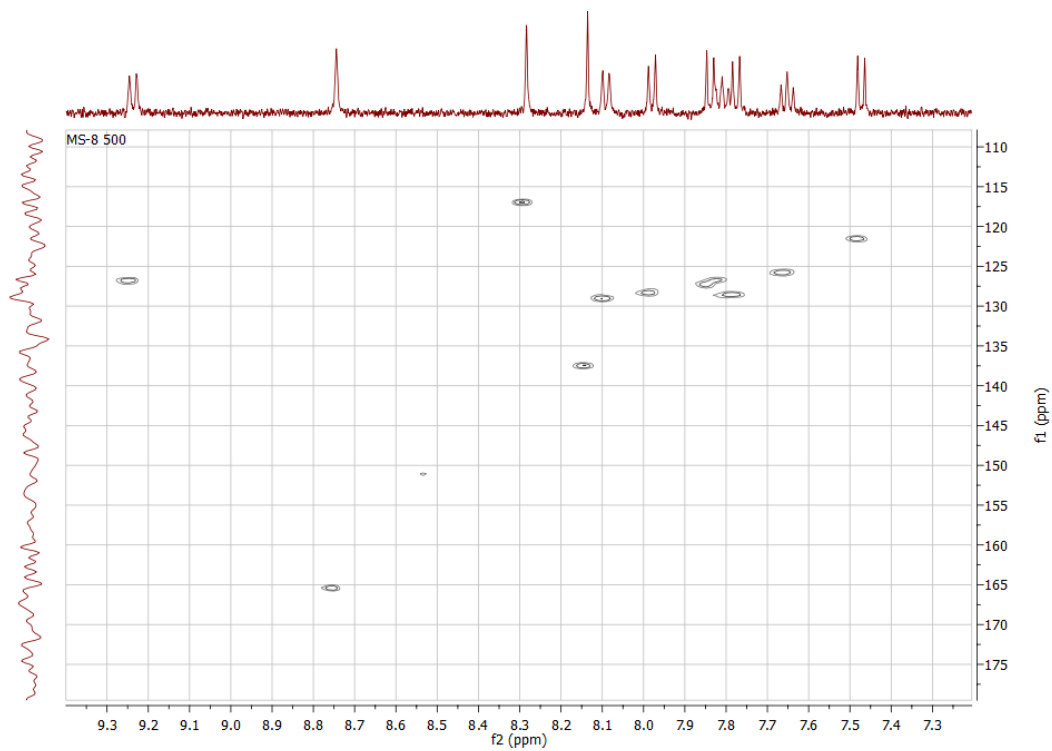

HMBC  $^1\text{H}$ - $^{13}\text{C}$  2-D NMR spectrum for compound 1.

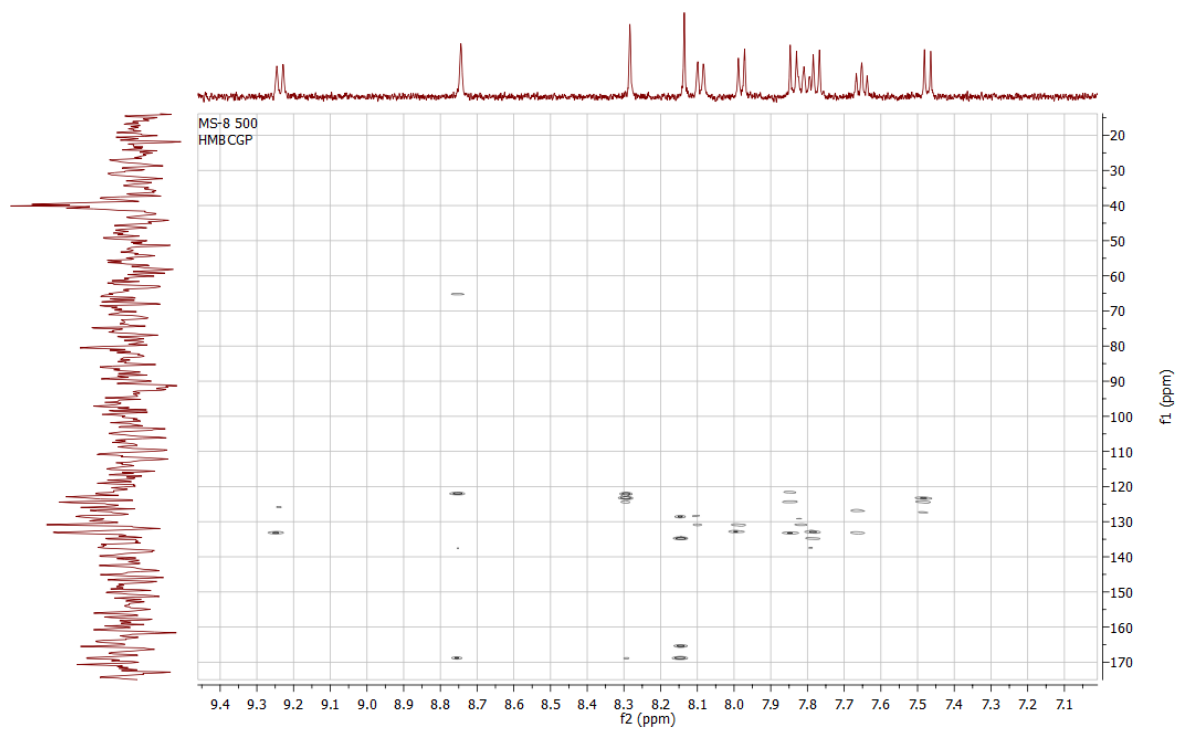

**<sup>1</sup>H NMR spectrum for compound 2.**

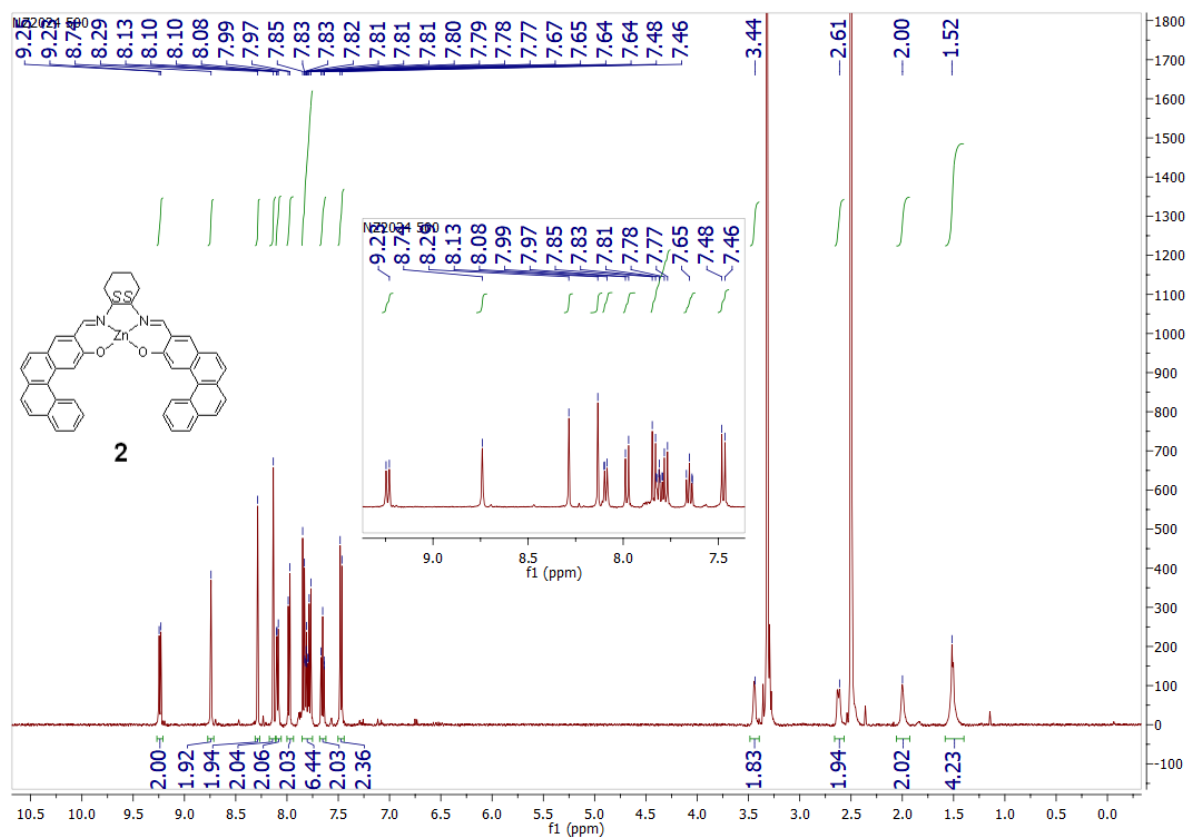

**<sup>13</sup>C NMR spectrum for compound 2.**

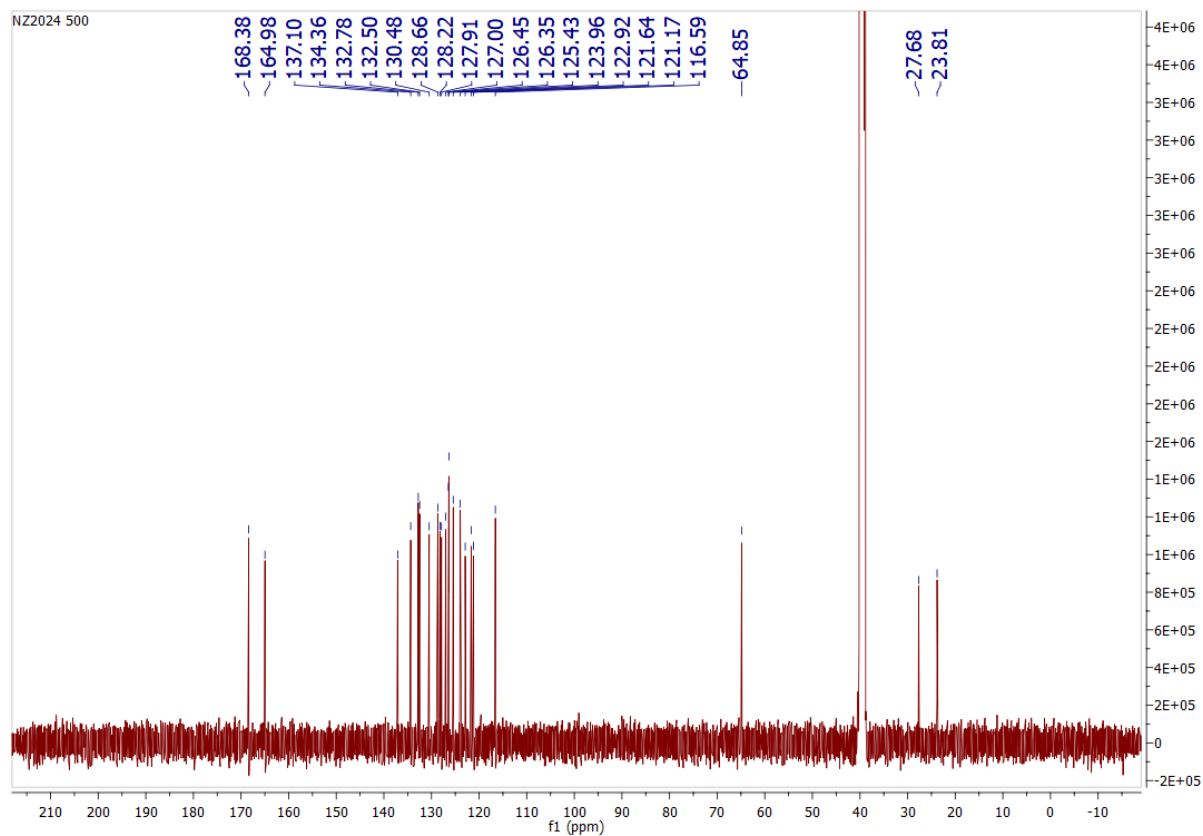

NOESY  $^1\text{H}$ - $^1\text{H}$  2-D NMR spectrum for compound 2 (aromatic region).

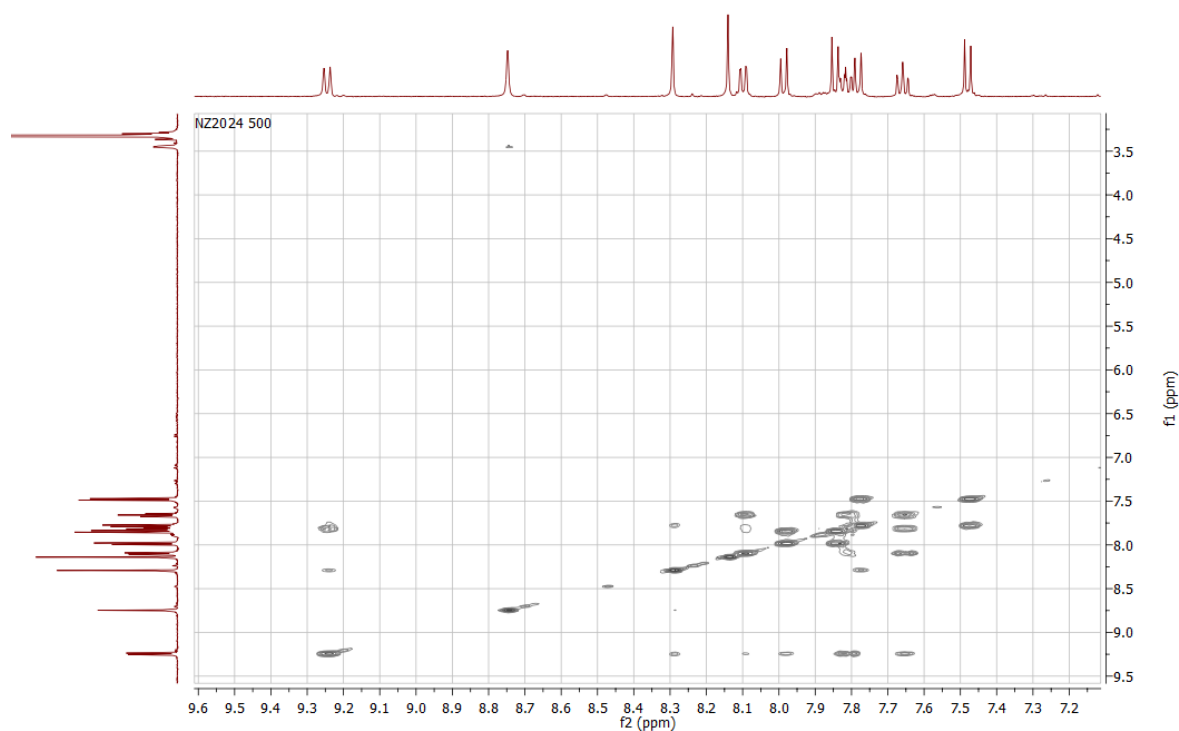

NOESY  $^1\text{H}$ - $^1\text{H}$  2-D NMR spectrum for compound 2 (aliphatic region).

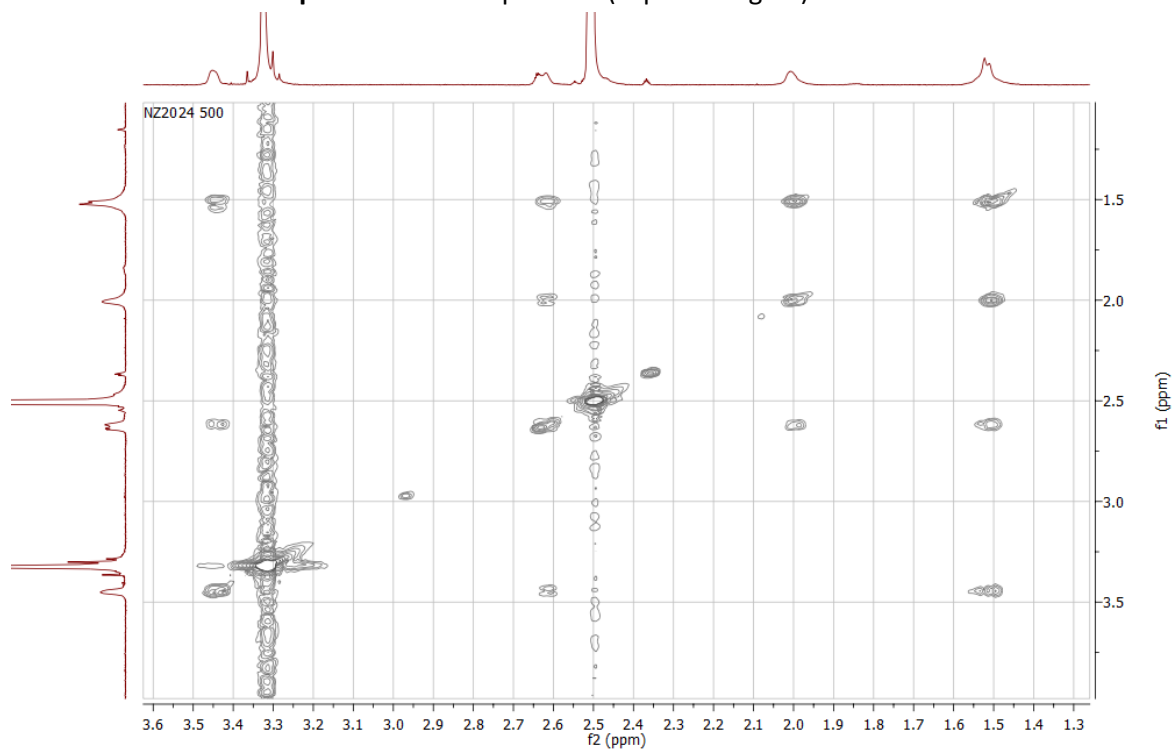

HSQC  $^1\text{H}$ - $^{13}\text{C}$  2-D NMR spectrum for compound 2 (aromatic region).

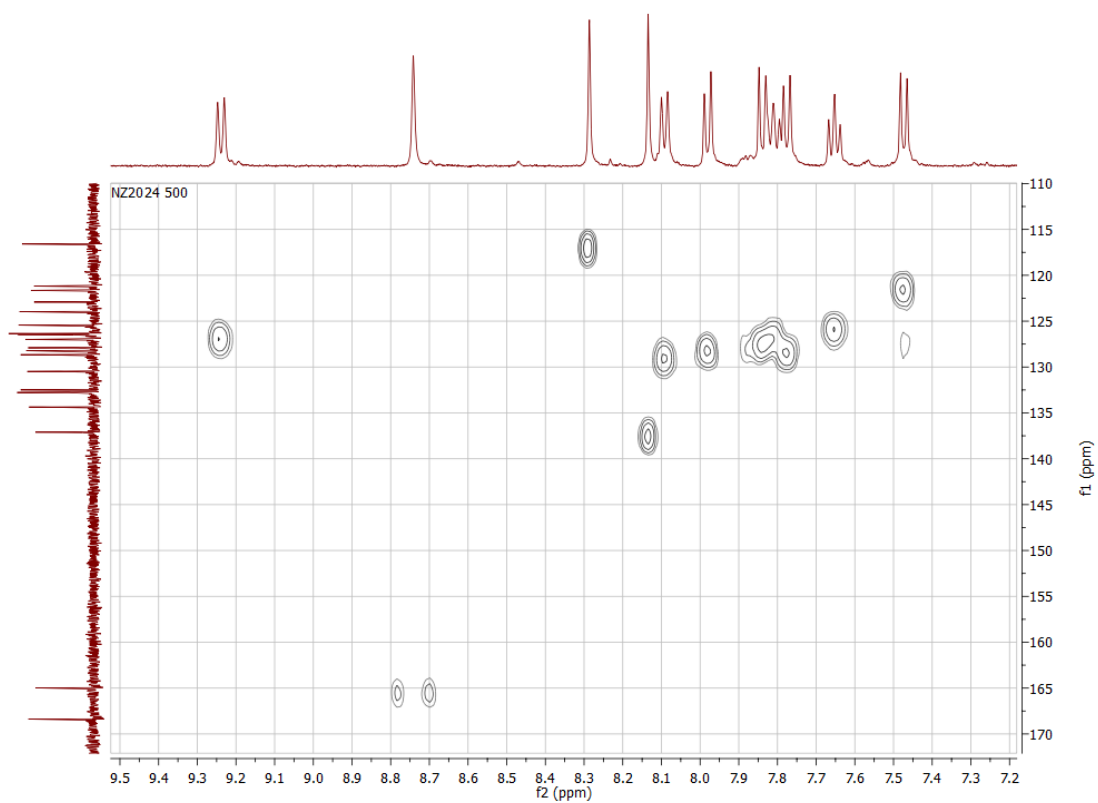

HSQC  $^1\text{H}$ - $^{13}\text{C}$  2-D NMR spectrum for compound 2 (aliphatic region).

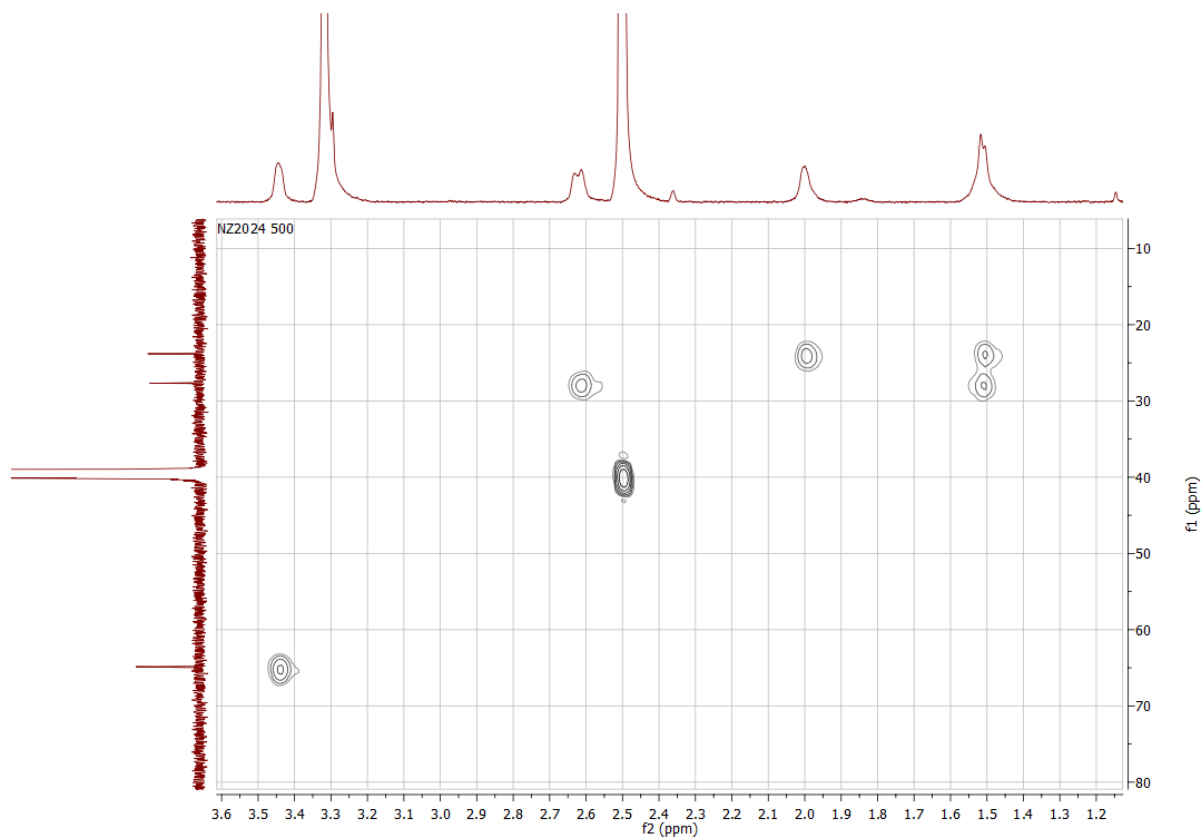

HMBC  $^1\text{H}$ - $^{13}\text{C}$  2-D NMR spectrum for compound 2.

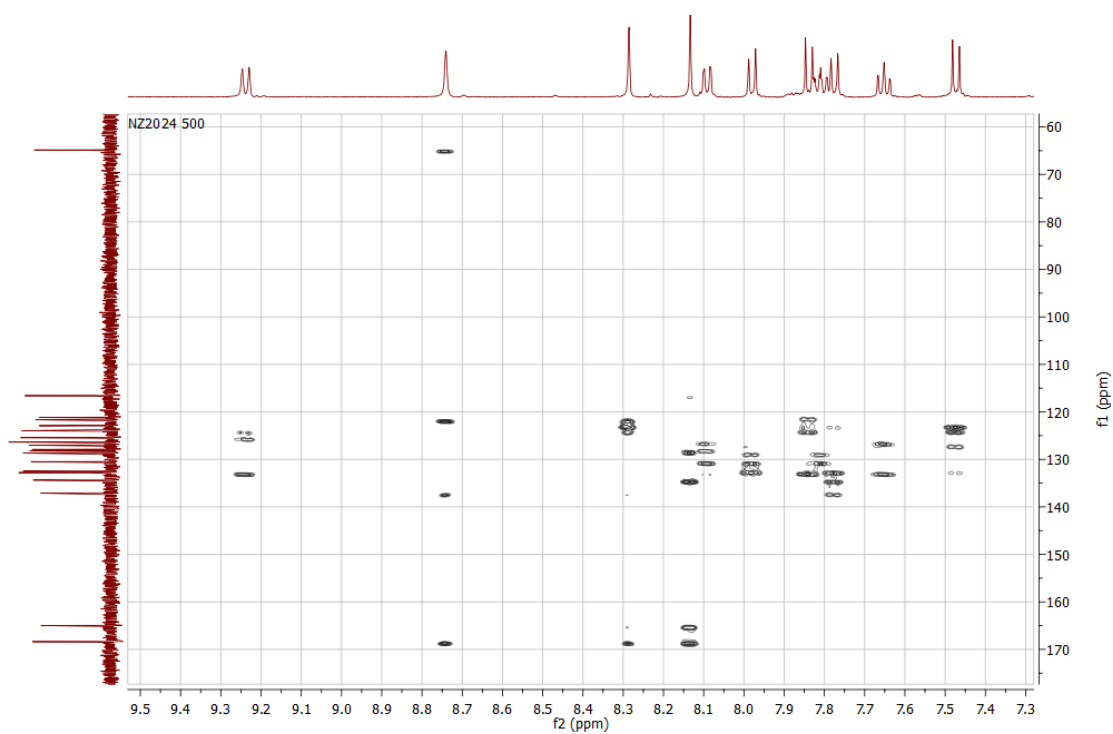

**<sup>1</sup>H NMR spectrum for compound 3.**

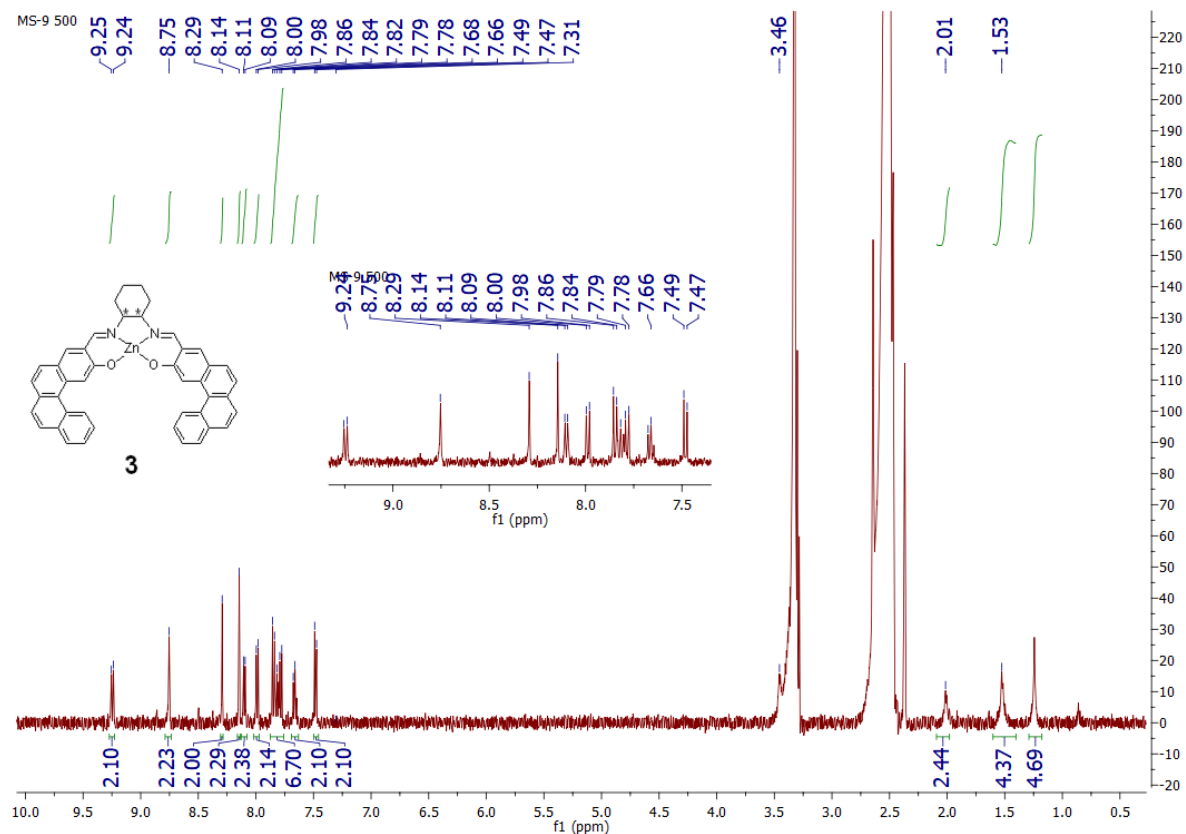

**COSY <sup>1</sup>H-<sup>1</sup>H 2-D NMR spectrum for compound 3 (aromatic region).**

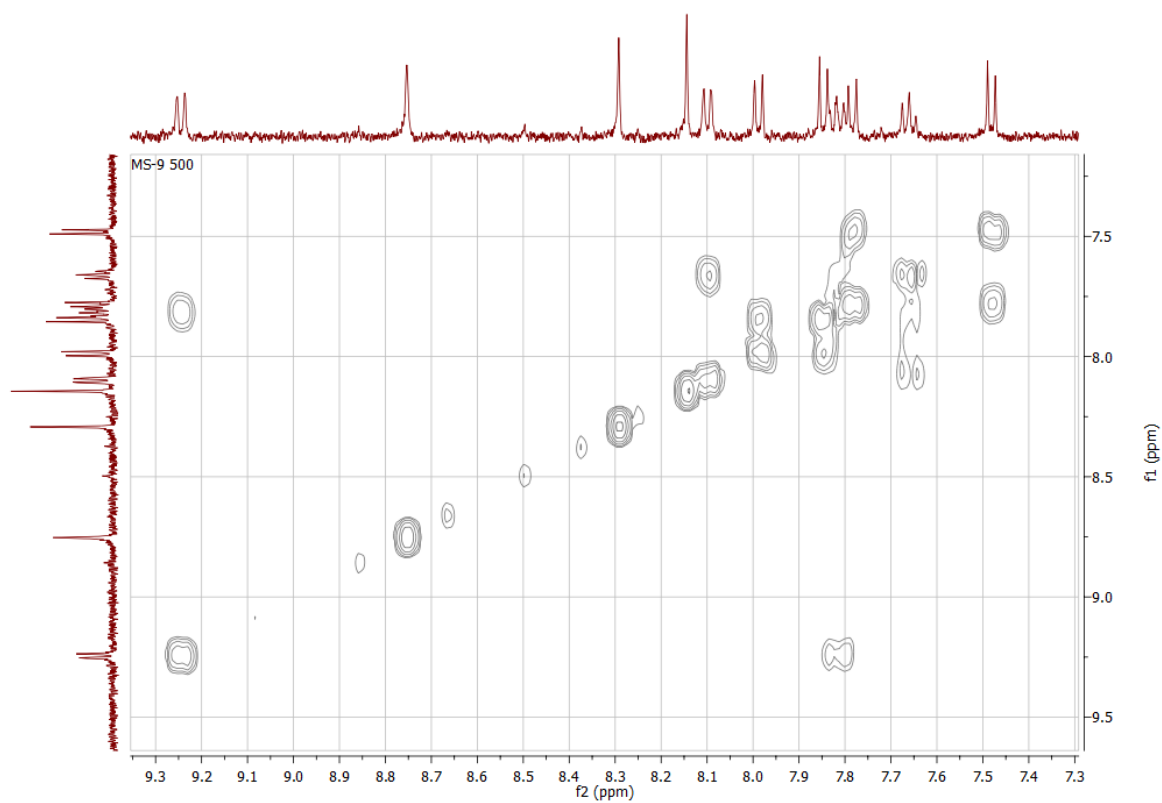

**COSY  $^1\text{H}$ - $^1\text{H}$  2-D NMR spectrum for compound 3 (aliphatic region).**

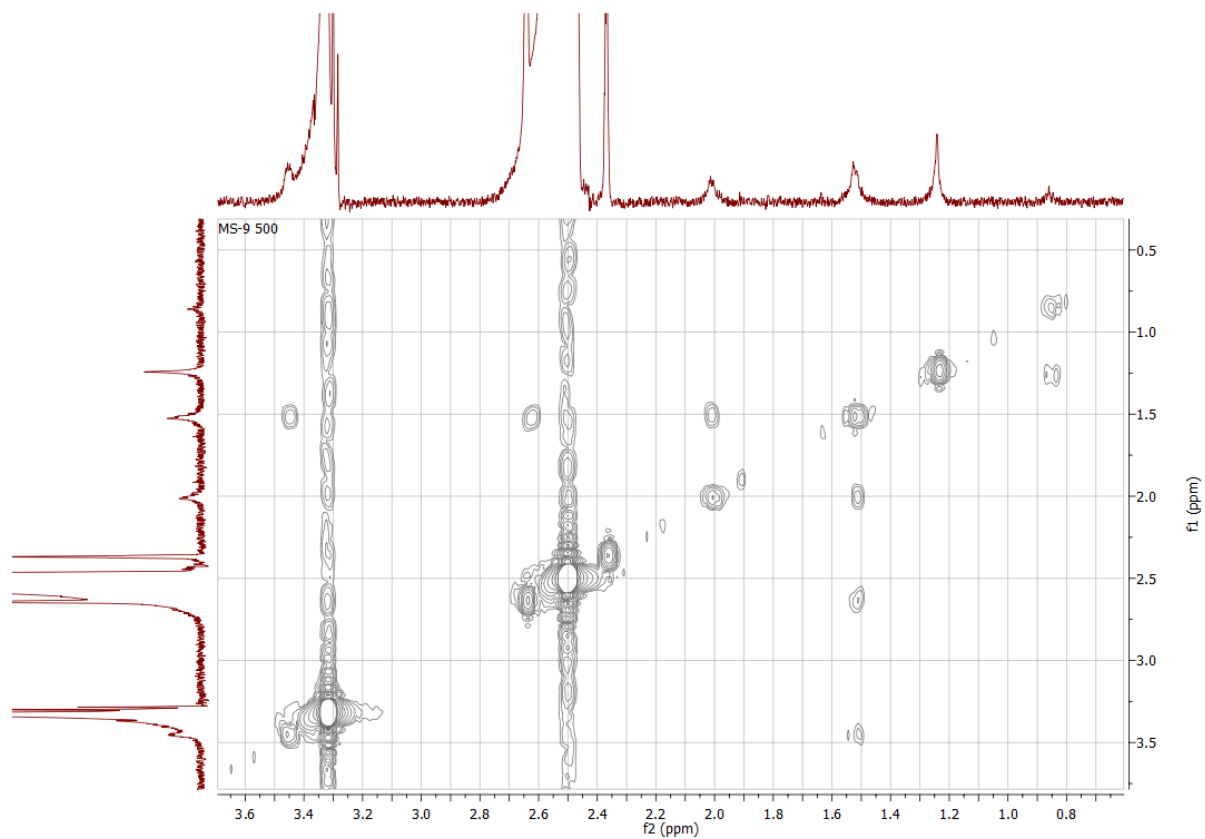

**HSQC  $^1\text{H}$ - $^{13}\text{C}$  2-D NMR spectrum for compound 3 (aromatic region).**

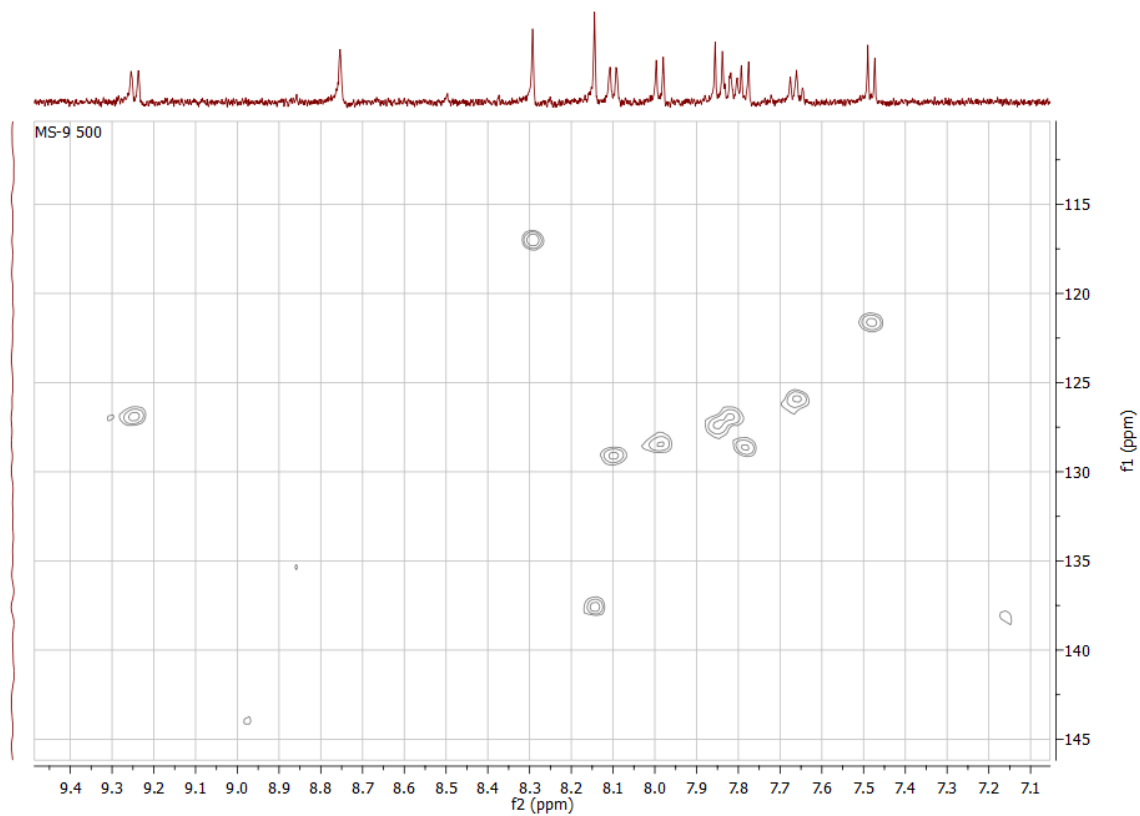



HSQC  $^1\text{H}$ - $^{13}\text{C}$  2-D NMR spectrum for compound **3** (aliphatic region).

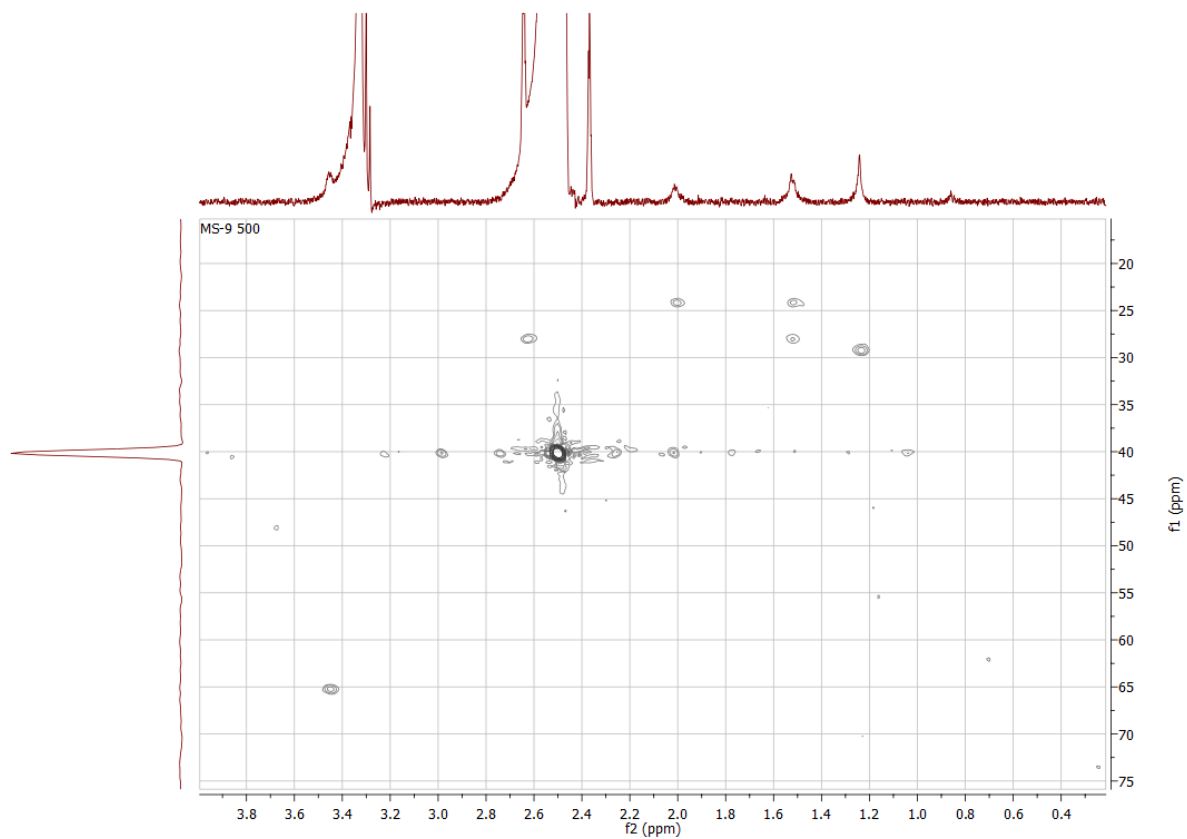

HMBC  $^1\text{H}$ - $^{13}\text{C}$  2-D NMR spectrum for compound **3** (aromatic region).

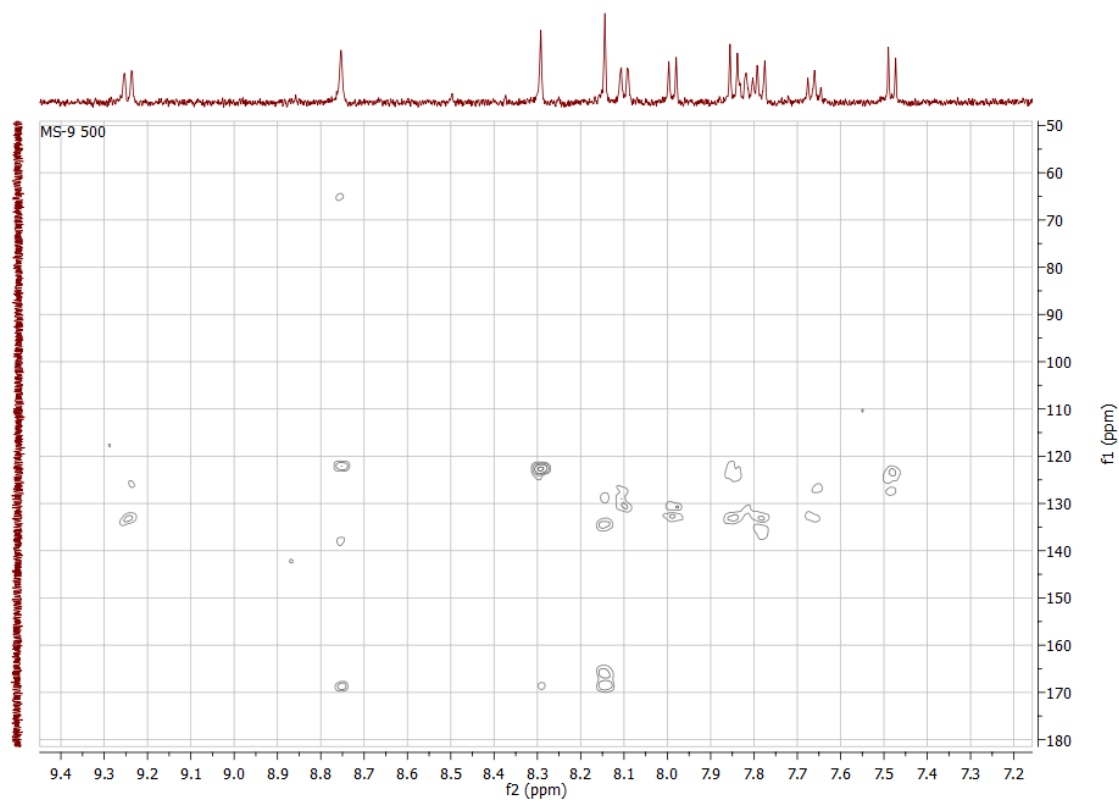

**<sup>1</sup>H NMR spectrum for compound 4.**

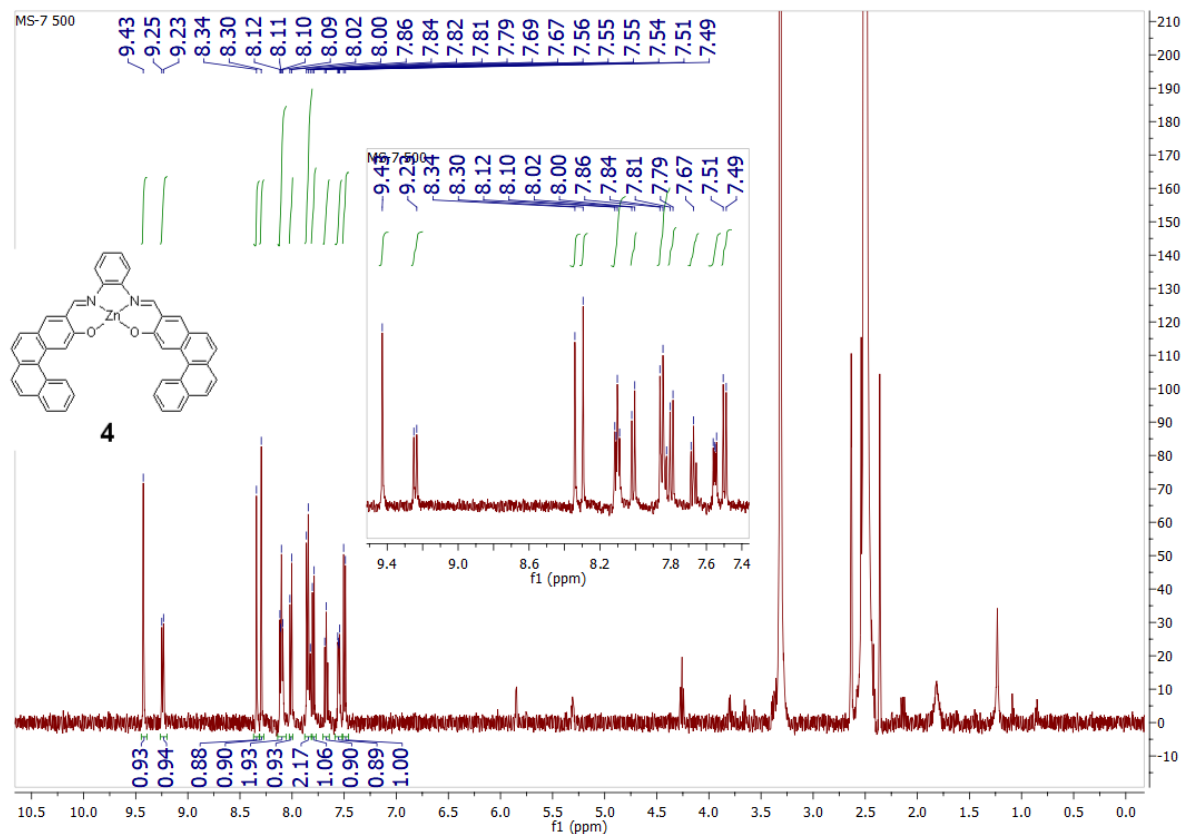

**COSY <sup>1</sup>H-<sup>1</sup>H 2-D NMR spectrum for compound 4.**

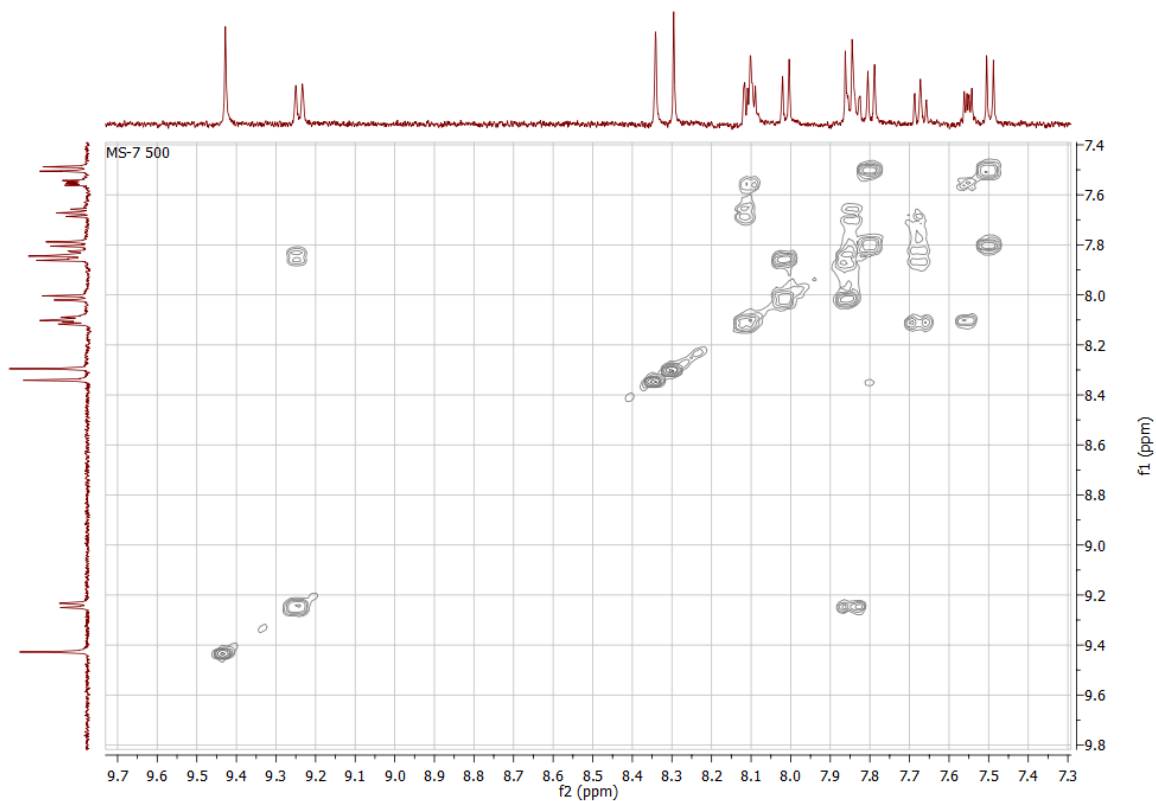

HMBC  $^1\text{H}$ - $^{13}\text{C}$  2-D NMR spectrum for compound 4.

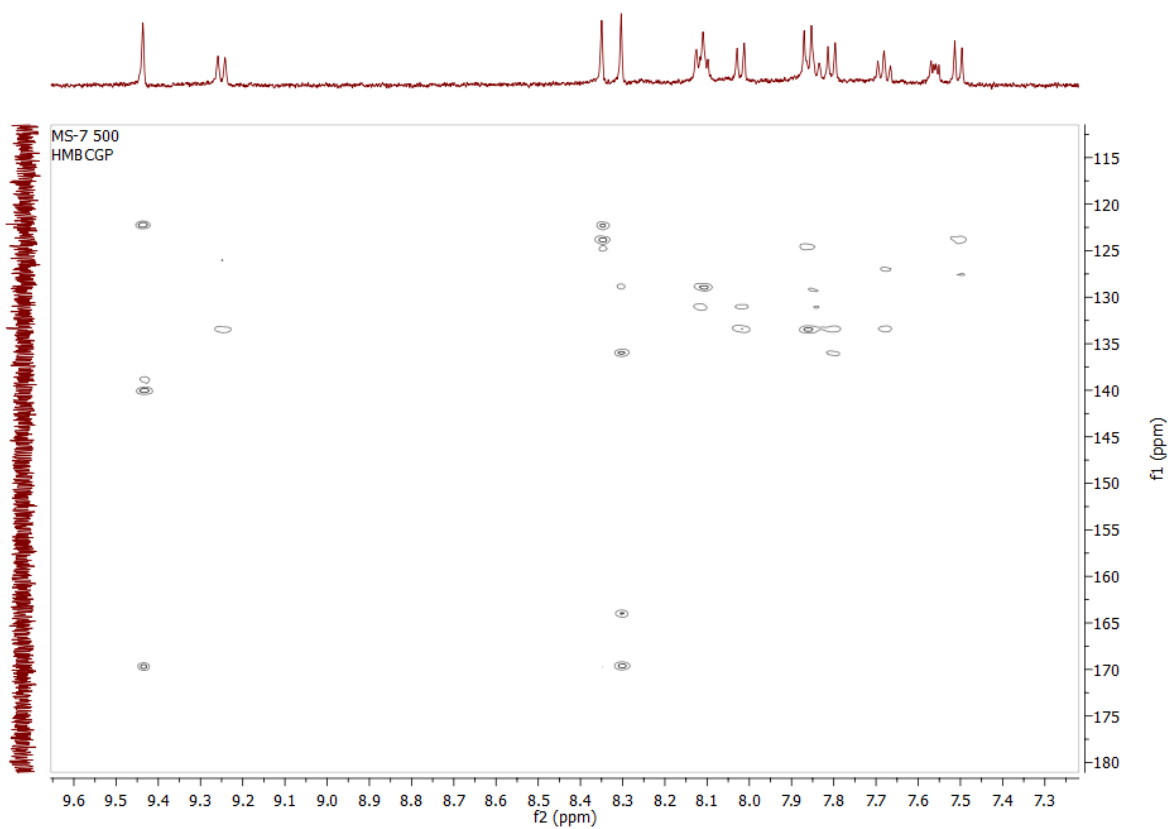

## References:

- 1 G. Sheldrick, *Acta Crystallogr. Sect. A*, 2008, 64, 112–122.
- 2 G. M. Sheldrick, *Acta Crystallogr. Sect. Found. Adv.*, 2015, 71, 3–8.
- 3 C. B. Hübschle, G. M. Sheldrick and B. Dittrich, *J. Appl. Crystallogr.*, 2011, 44, 1281–1284.
- 4 O. V. Dolomanov, L. J. Bourhis, R. J. Gildea, J. a. K. Howard and H. Puschmann, *J. Appl. Crystallogr.*, 2009, 42, 339–341.
